# Supplementary material for: The assembly of “S3N”-ligands decorated with an azo-dye as potential sensors for heavy metal ions
Source: Royal Society of Chemistry journal article supplement (doi:10.1039/c7dt00569e), 2017-01-01
Supplement: c7dt00569e1.pdf [file c7dt00569e1.pdf]

## Supporting Information

### The assembly of "S<sub>3</sub>N"- ligands decorated with an azo-dye as potential sensors for heavy metal ions

O. K. Rasheed, J. J. W. McDouall, C. A. Muryn, J. Raftery, I. J. Vitorica-Yrezabal and P. Quayle\*

School of chemistry, University of Manchester, M13 9PL

[peter.quayle@manchester.ac.uk](mailto:peter.quayle@manchester.ac.uk)

#### i. <sup>1</sup>H and <sup>13</sup>C NMR data

##### Synthesis of 3,6,9-trithia-1(2,6)-pyridinacyclodecaphane (6)

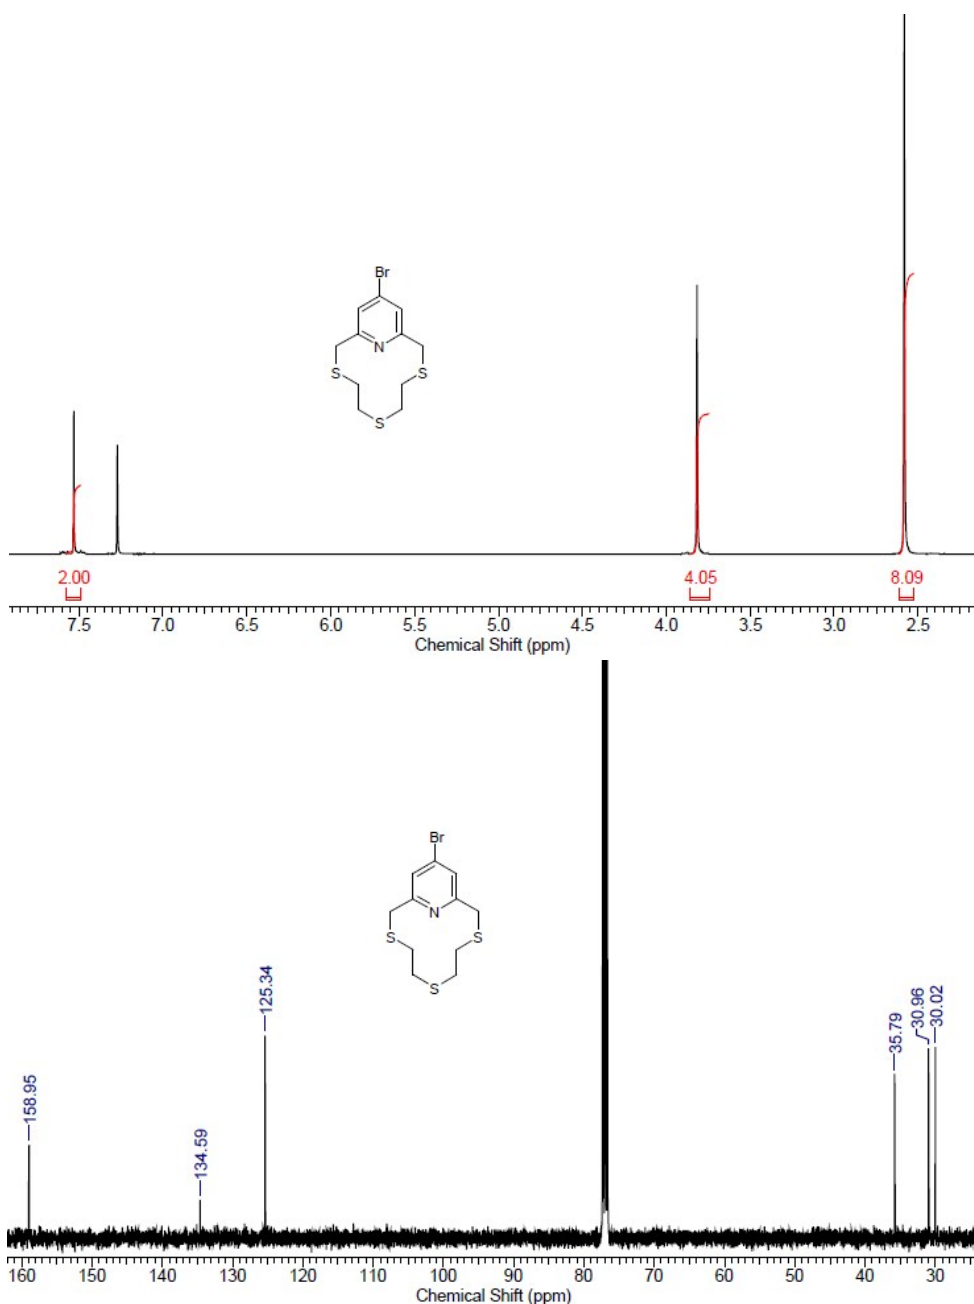

# Synthesis of 3,6,9-trithia-1(2,6)-pyridinacyclodecaphane (8):

3N COMPLEX.010.001.1R.esp

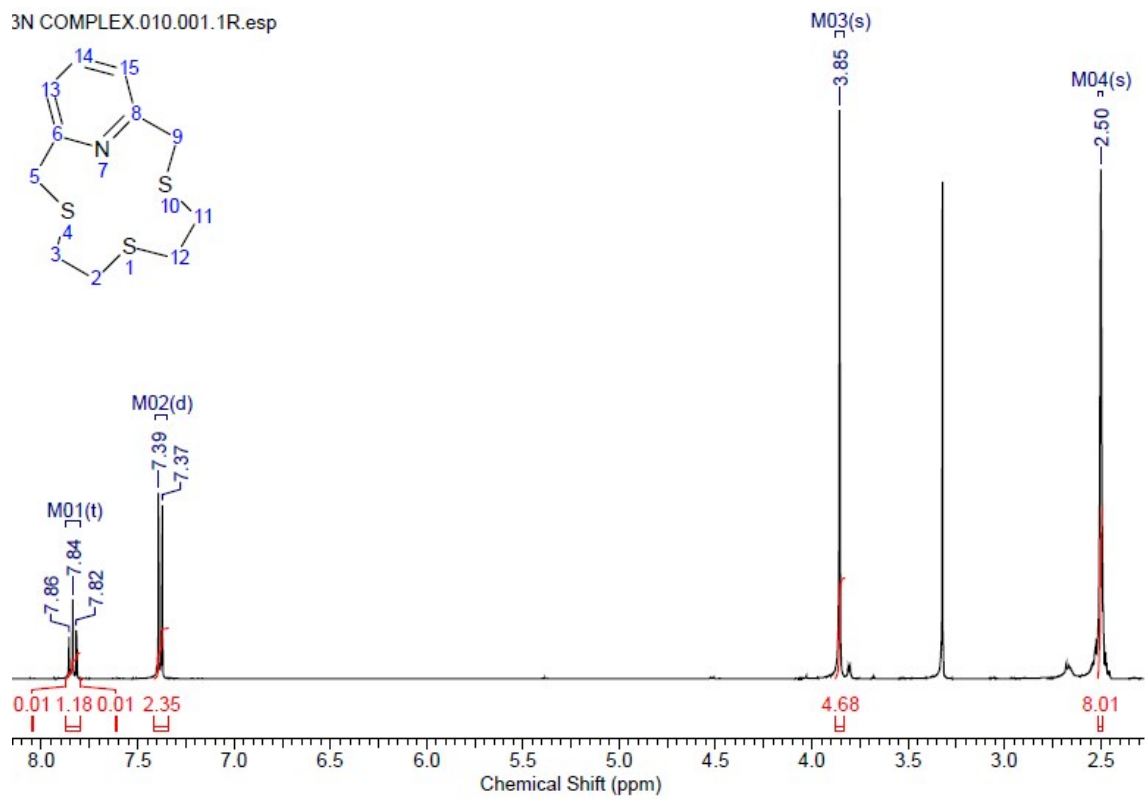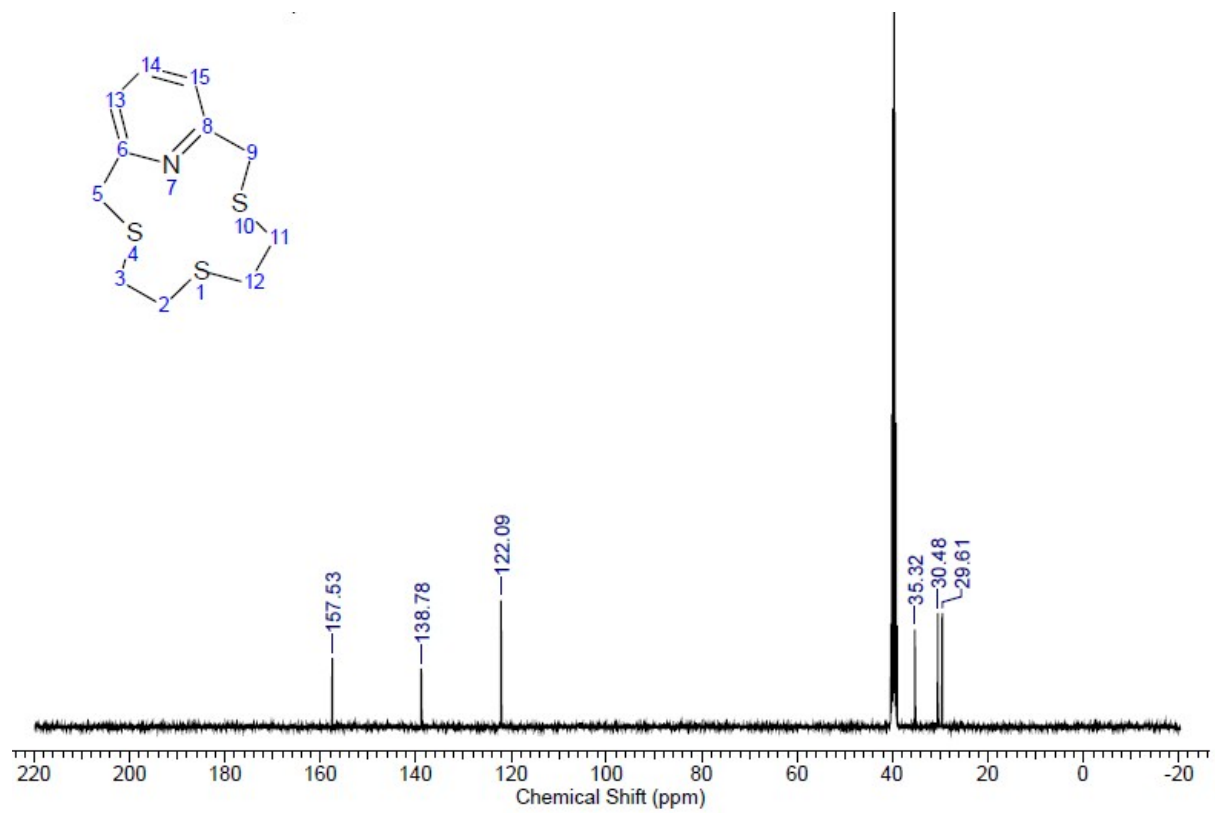

# Synthesis of dimethyl 4-(4,4,5,5-tetramethyl-1,3,2-dioxaborolan-2-yl)pyridine-2,6-dicarboxylate (10)

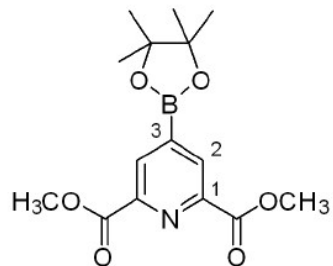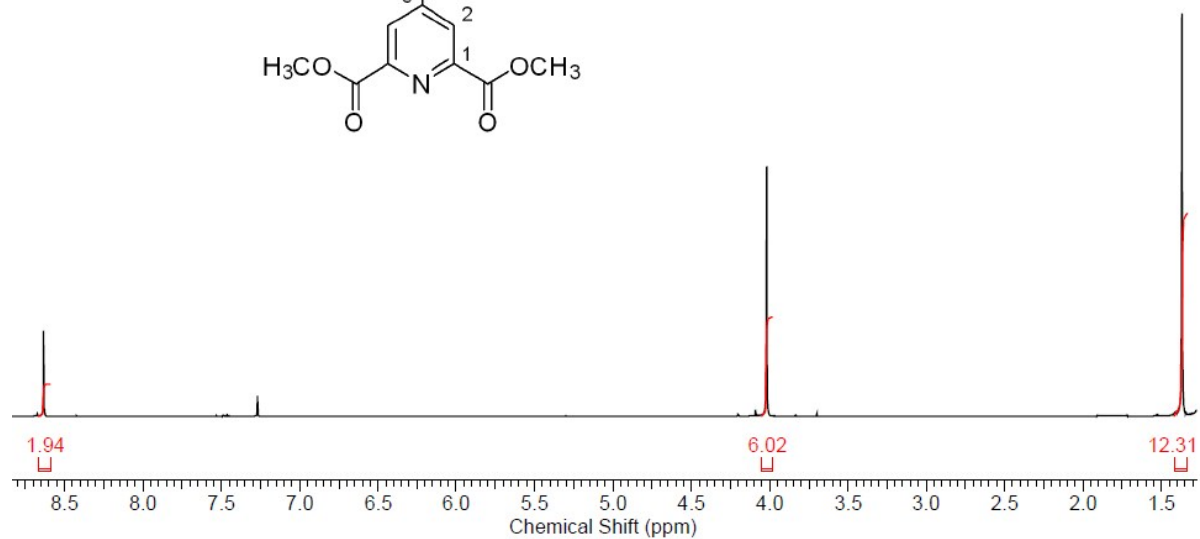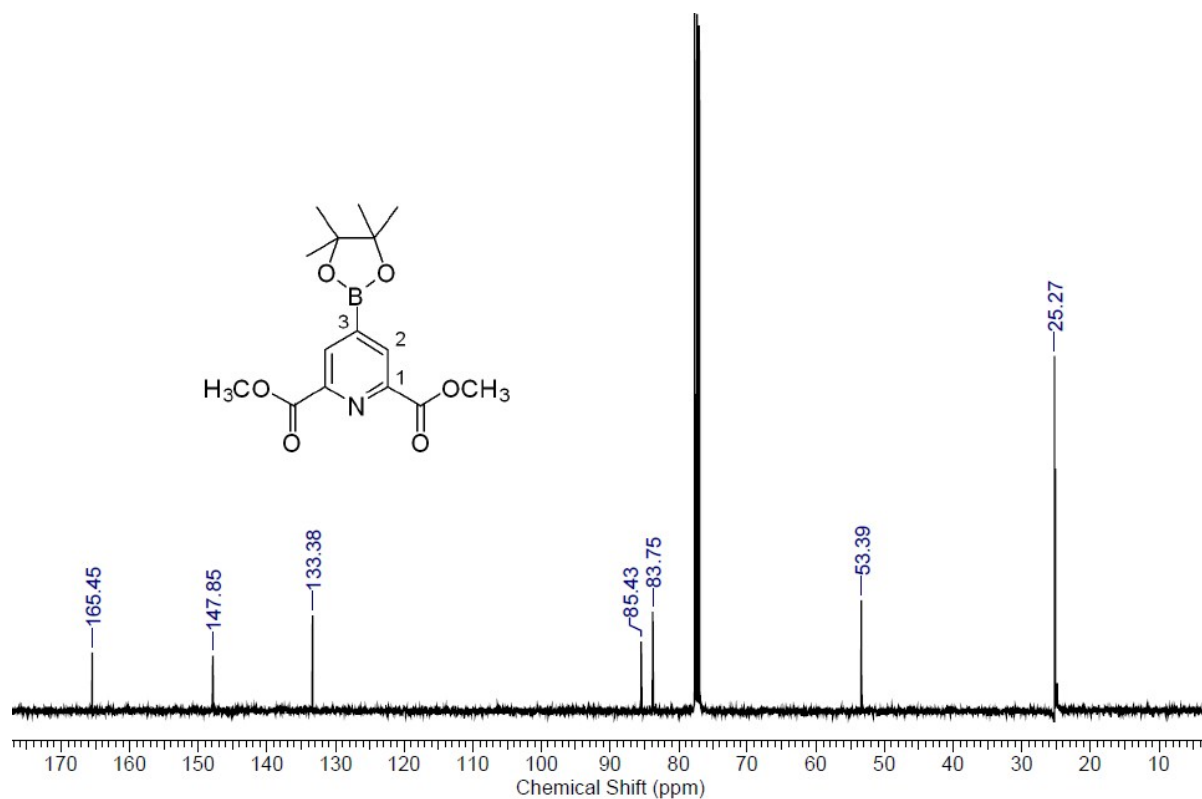

Synthesis of (E)-1-(4-methoxyphenyl)-2-(4-(4,4,5,5-tetramethyl-1,3,2-dioxaborolan-2-yl)phenyl)diazene (12):

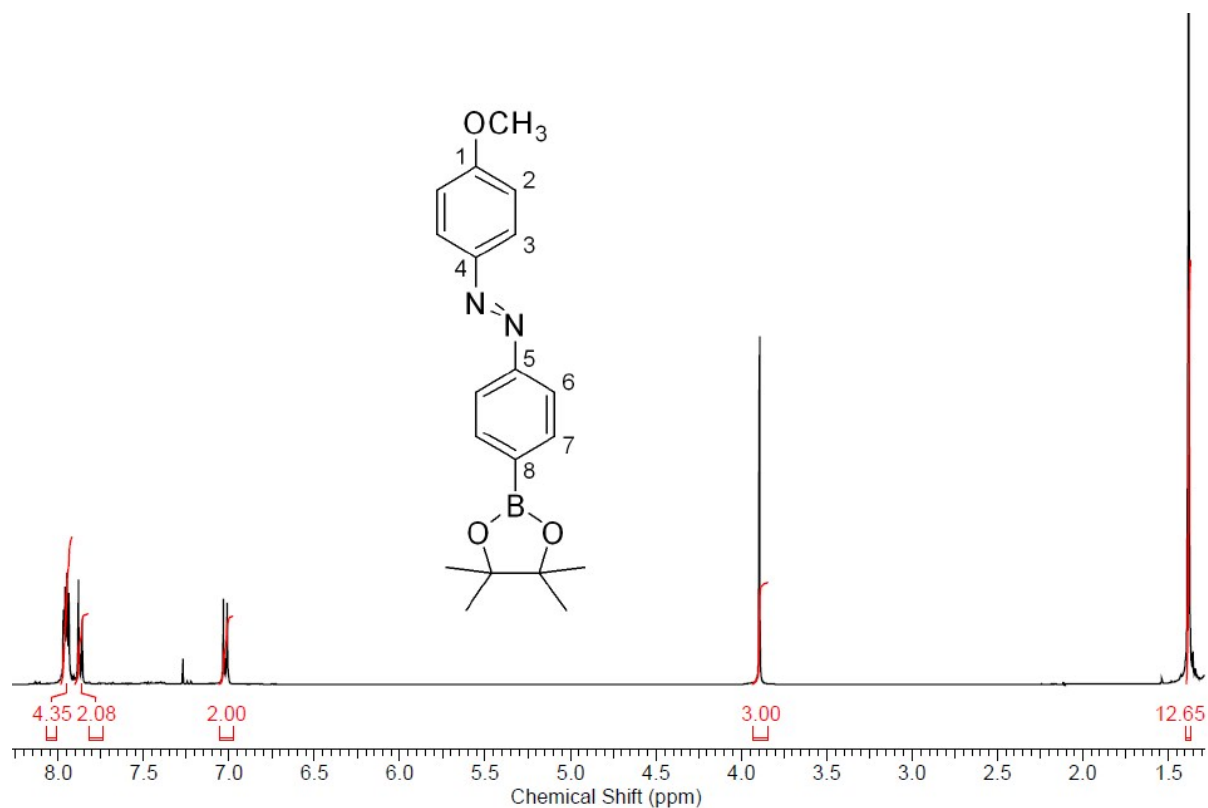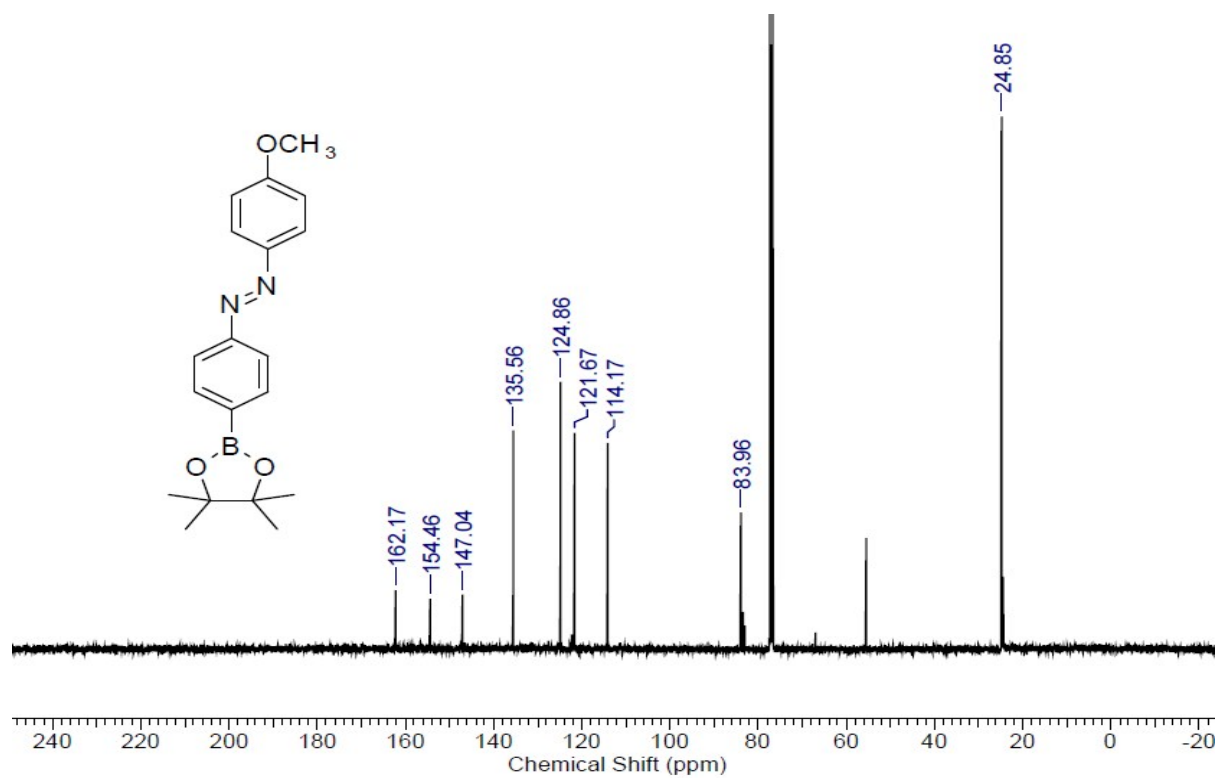

**(E)-1<sup>4</sup>-(4-((4-methoxyphenyl)diazenyl)phenyl)-3,6,9-trithia-1(2,6)-pyridinacyclodecaphane**

**(13):**

2014-11-12-FAQ-49

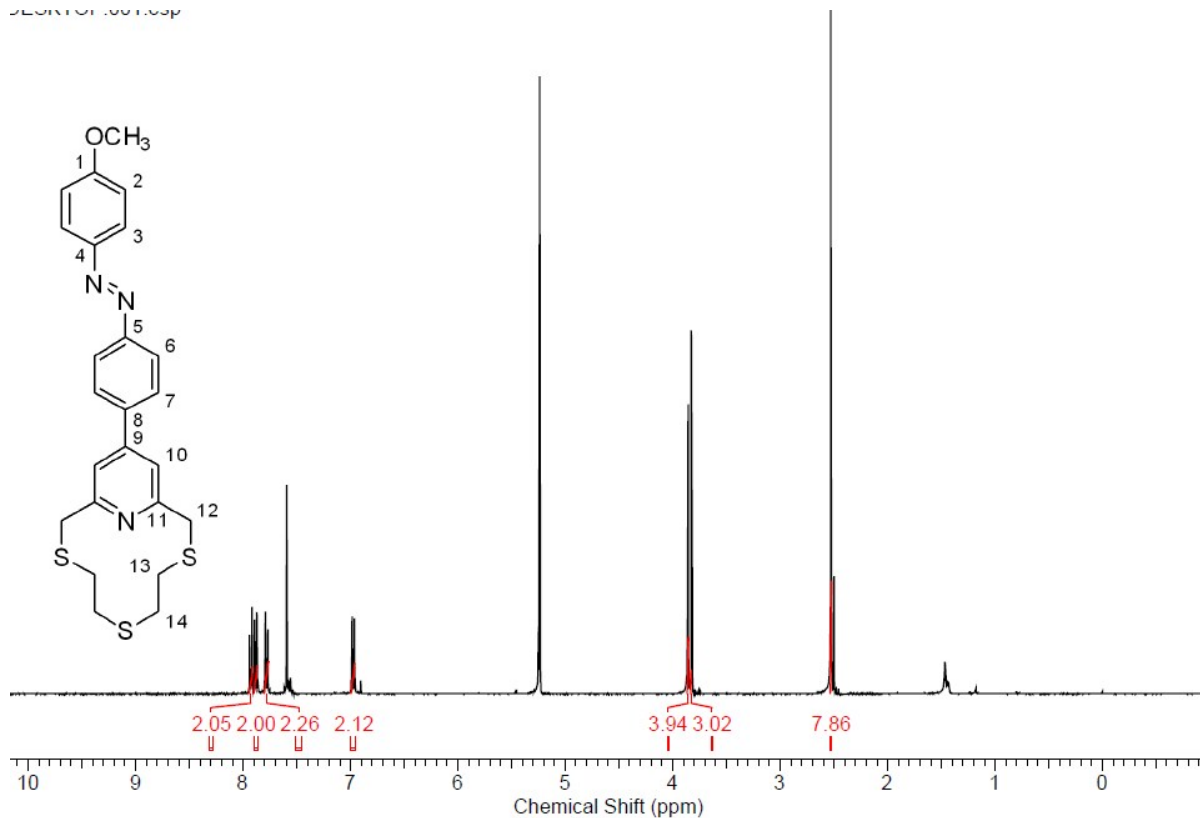

2014-11-12-FAQ-49 DTL MACRO CARBON.D11.001.F1.R.esp

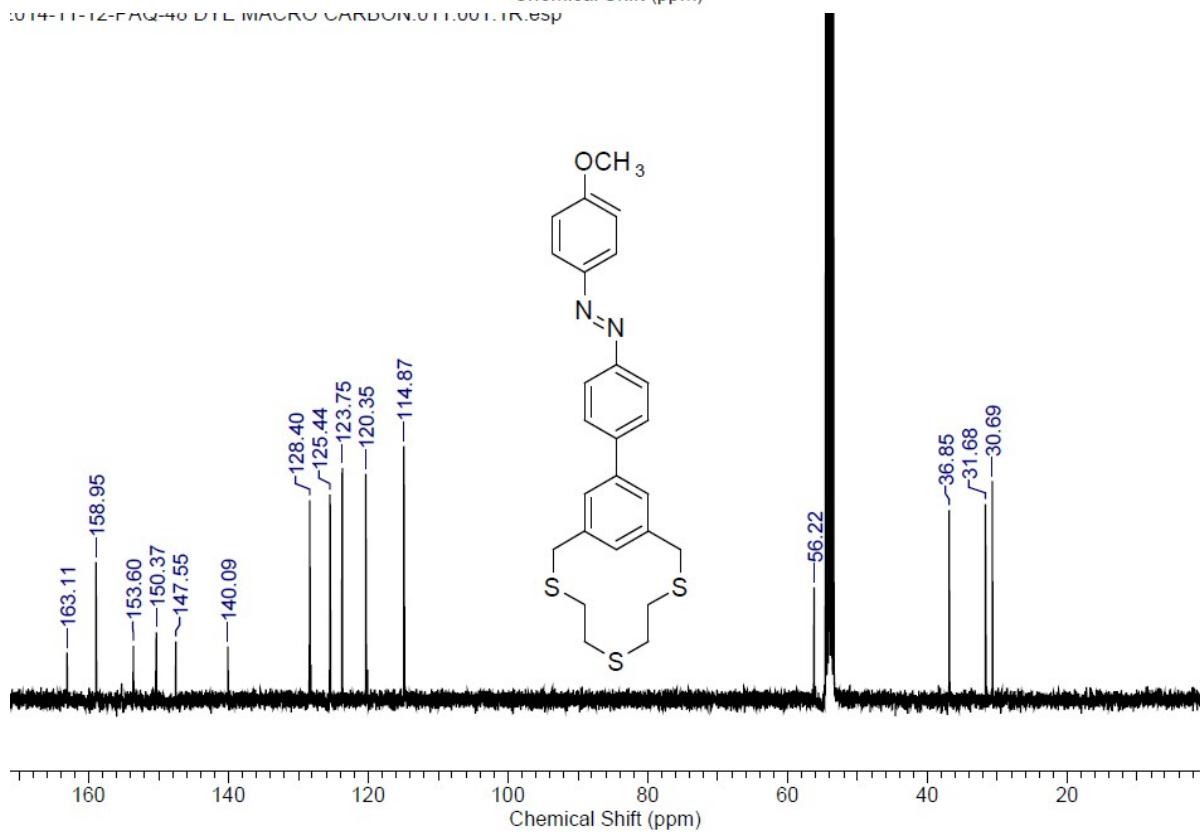

Synthesis of dimethyl (E)-4-(4-(4-methoxyphenyl)diazenyl)phenyl)pyridine-2,6-dicarboxylate (14):

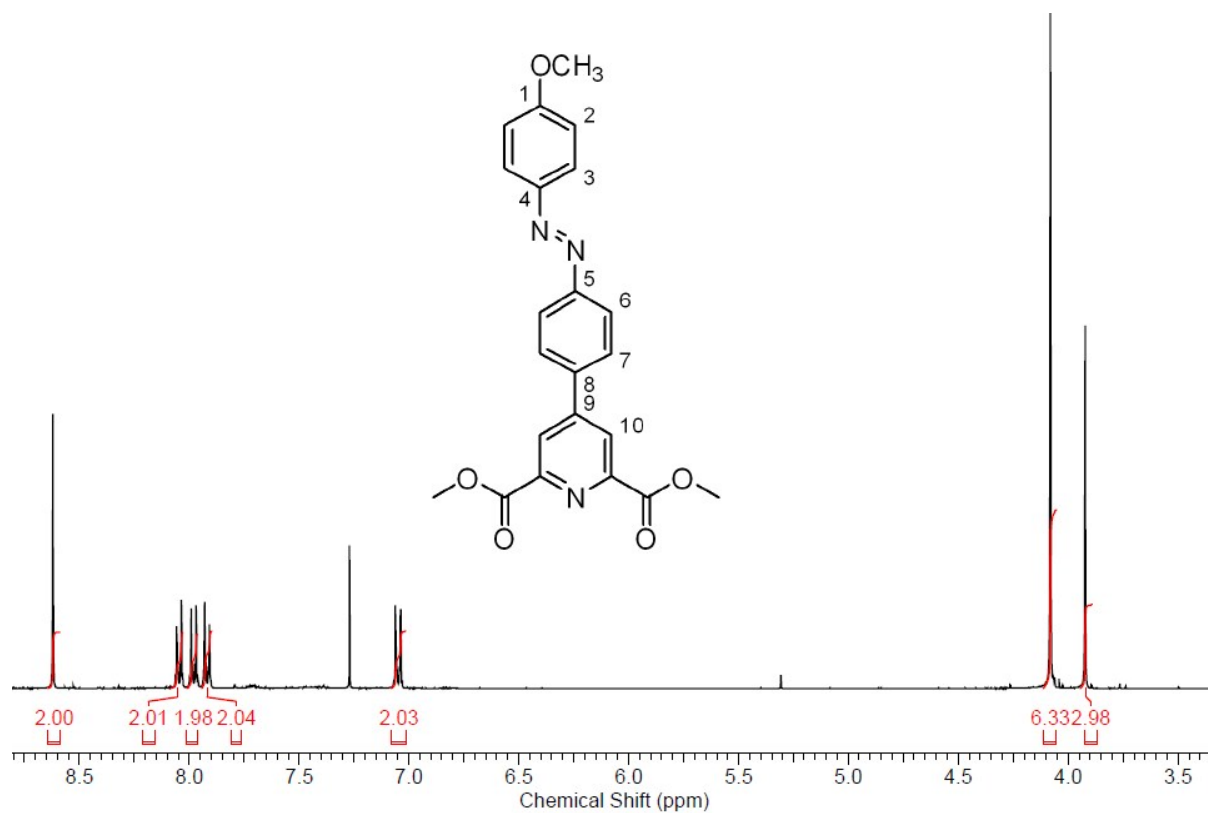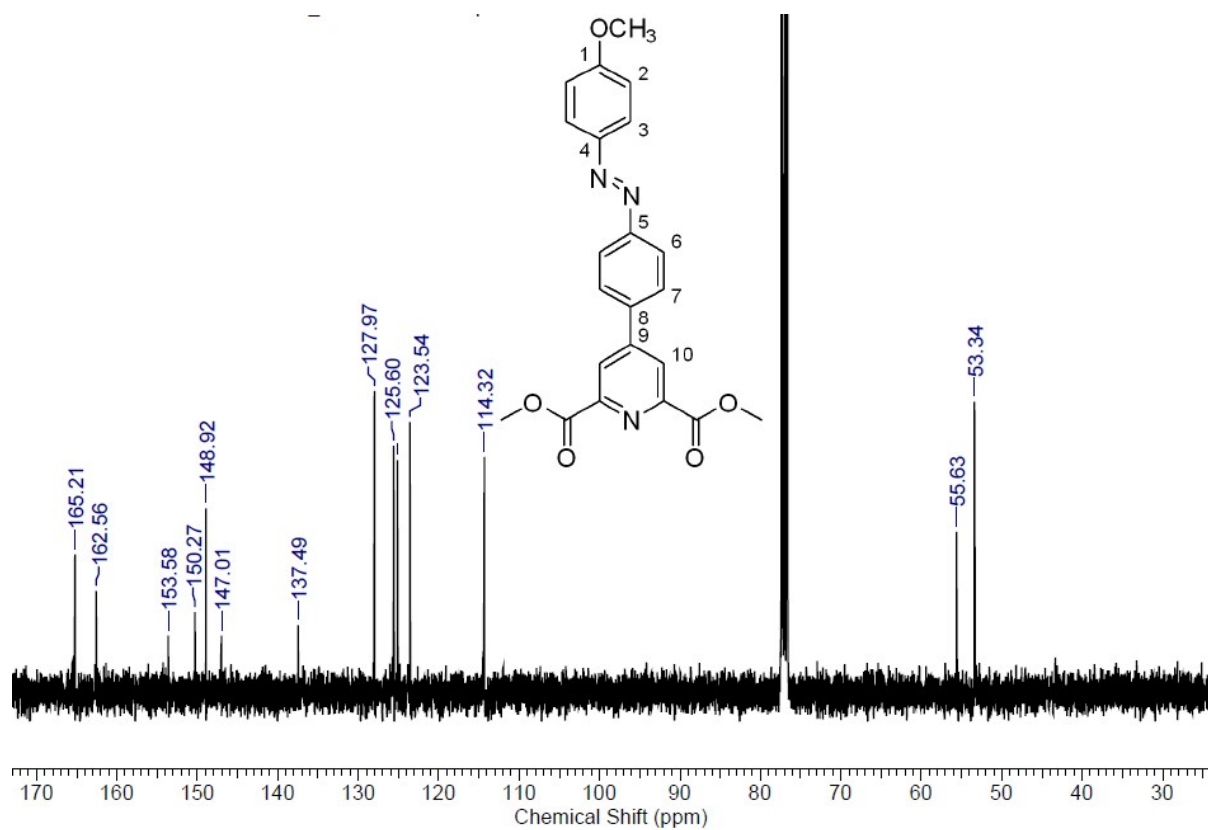

Silver complex(15):

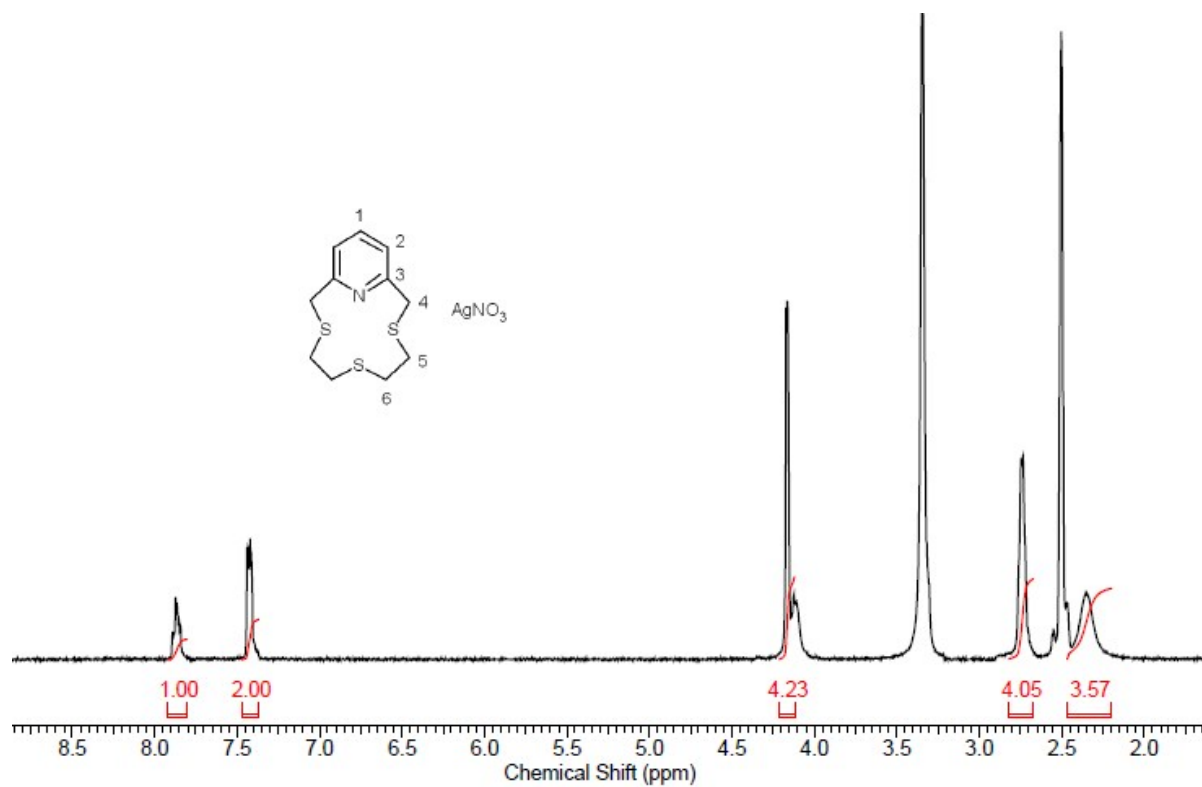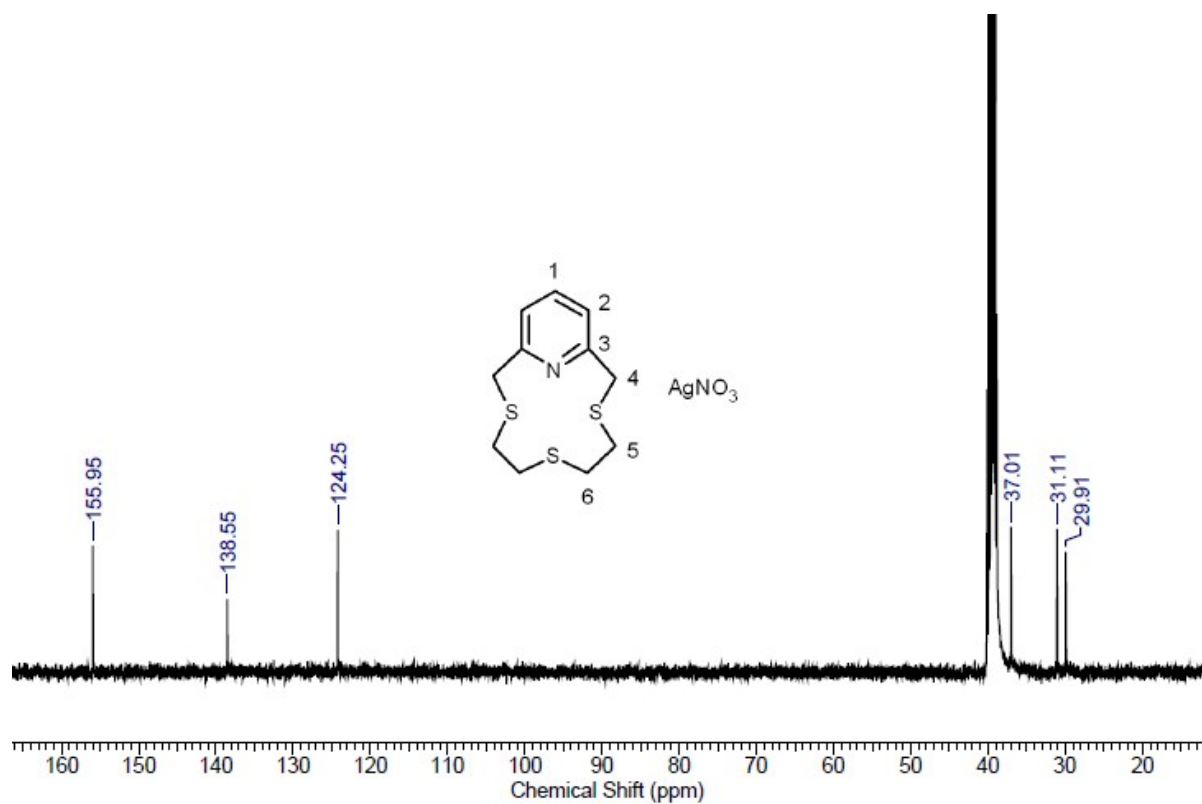

Silver complex (16):

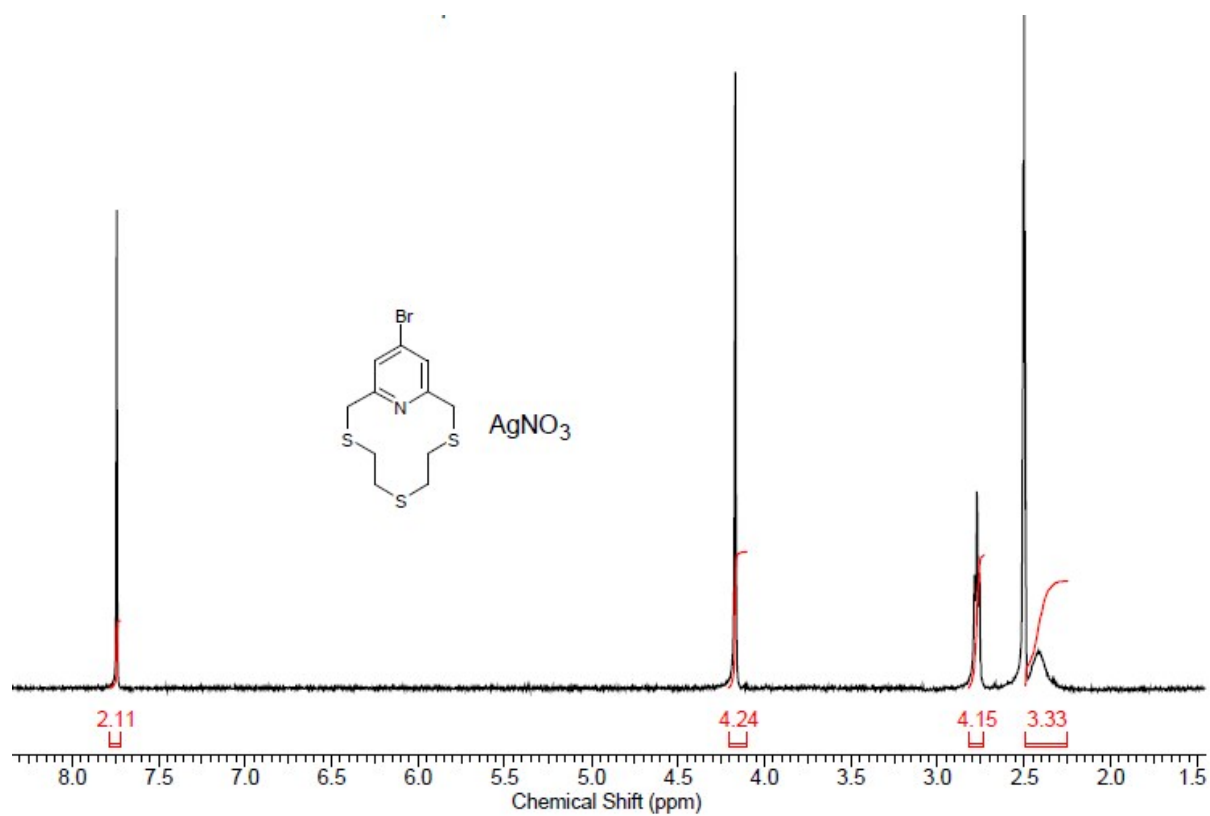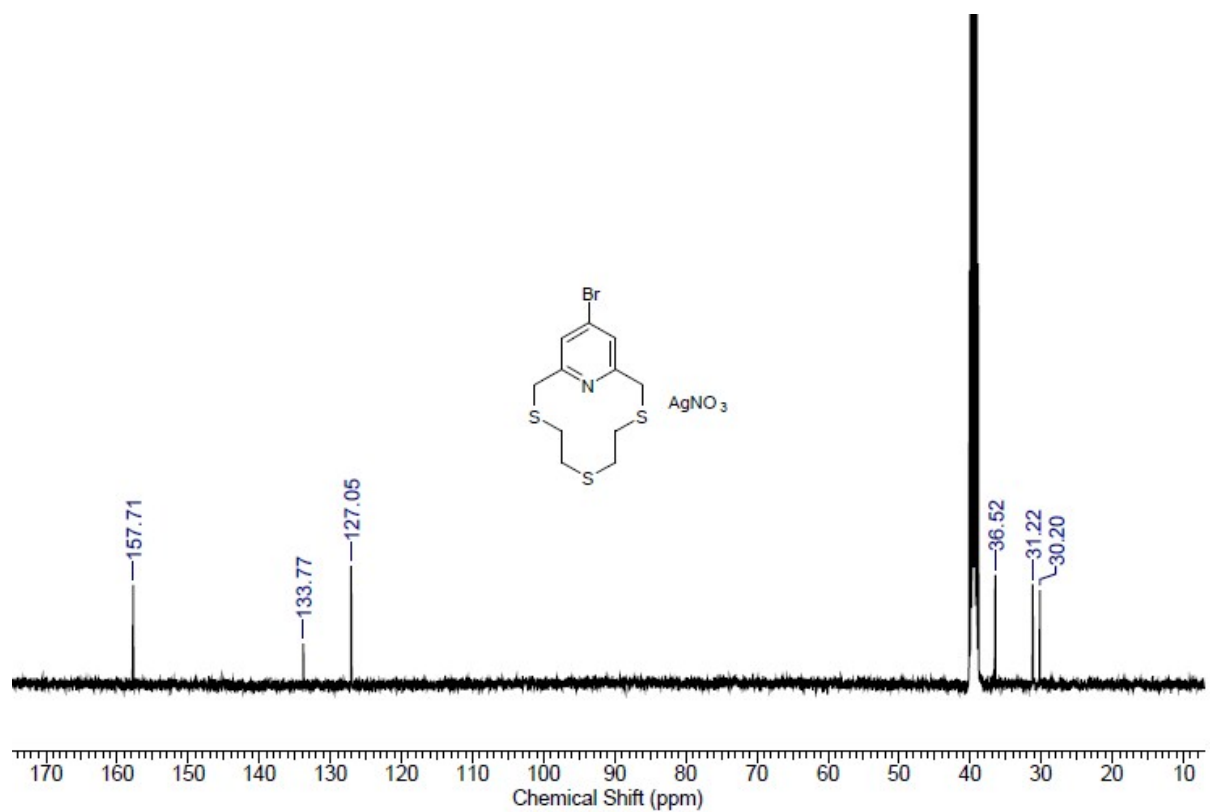



Silver complex (17):

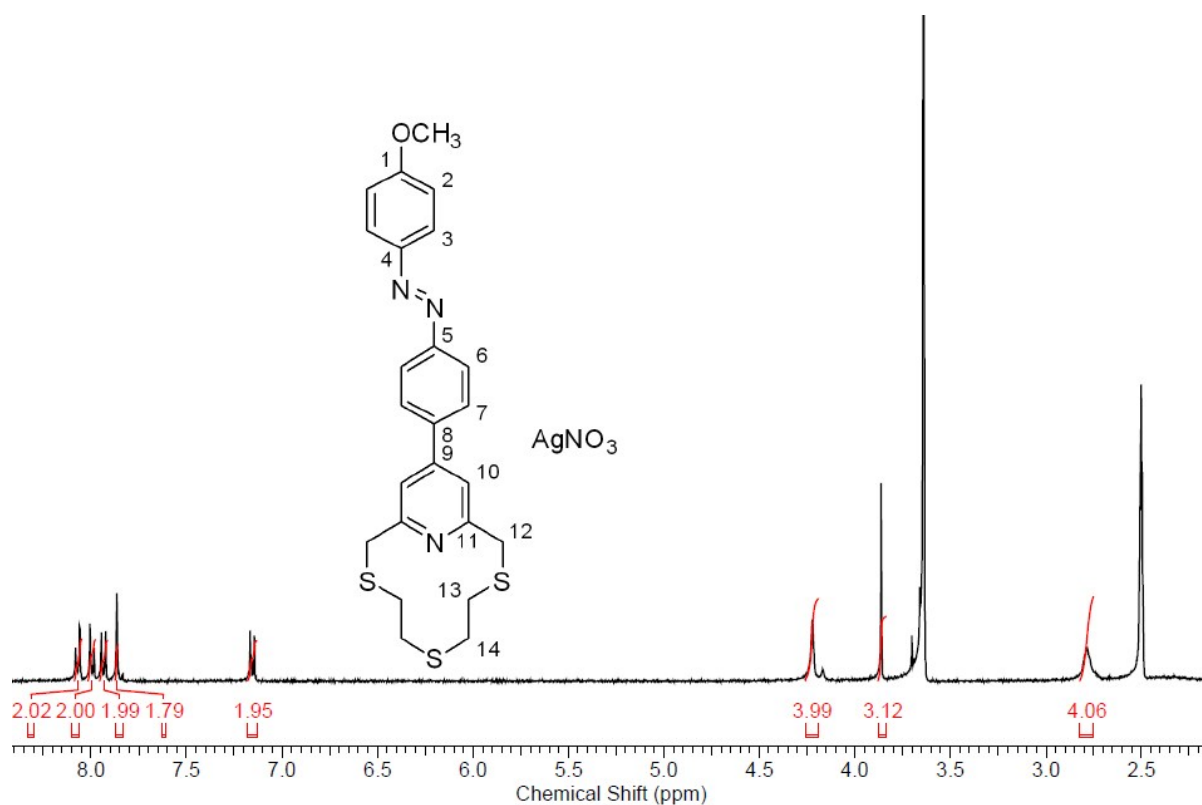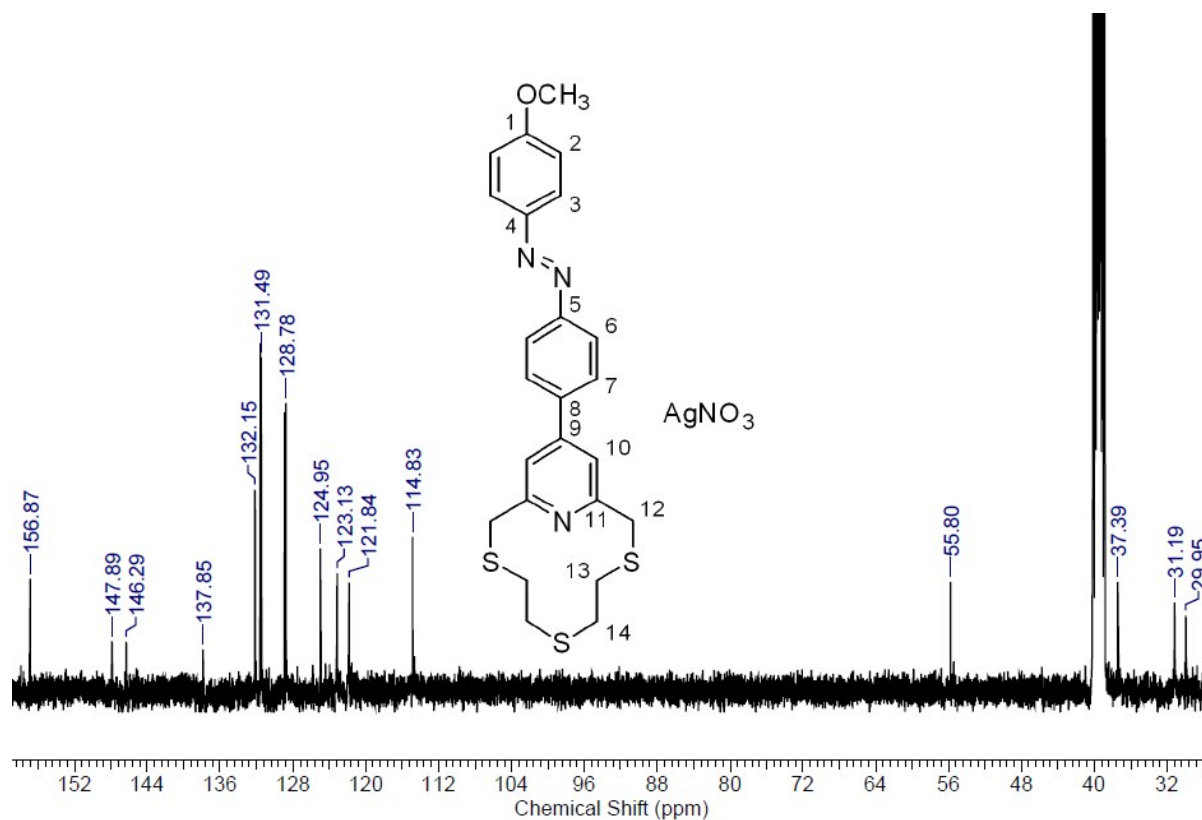

Mercury complex (21):

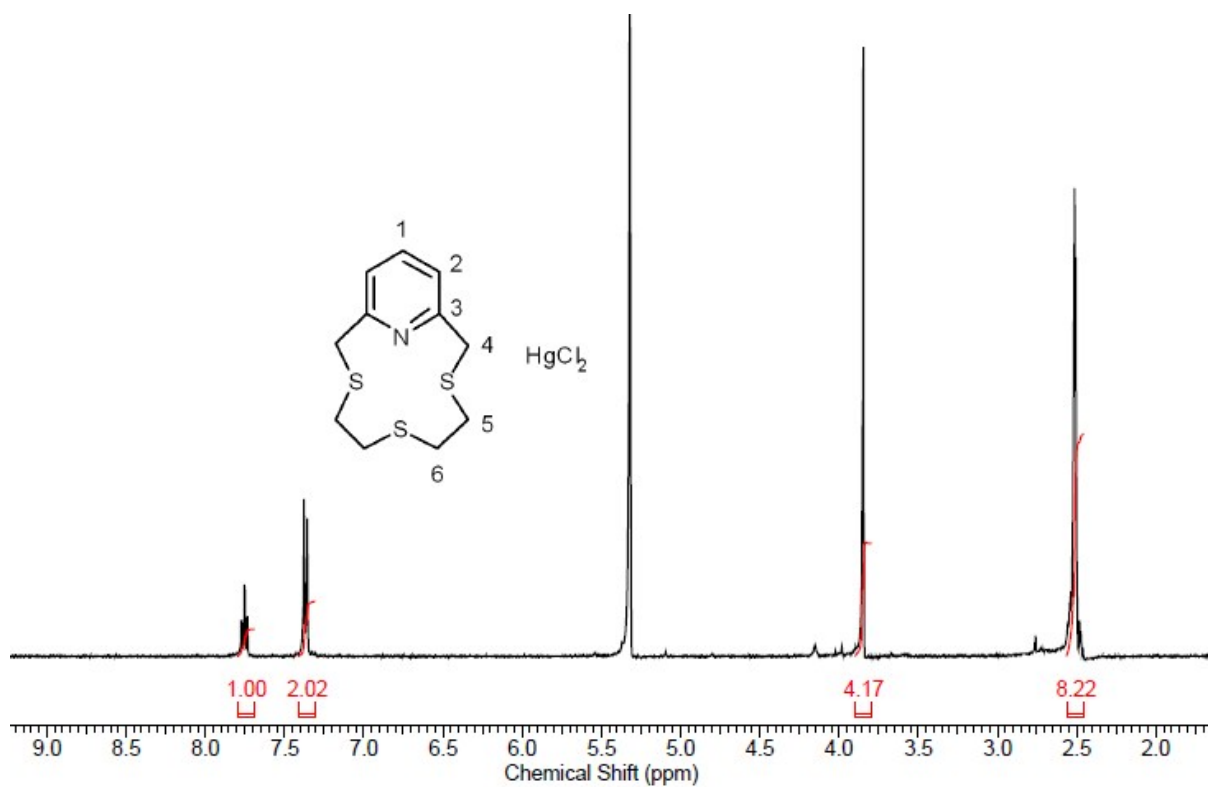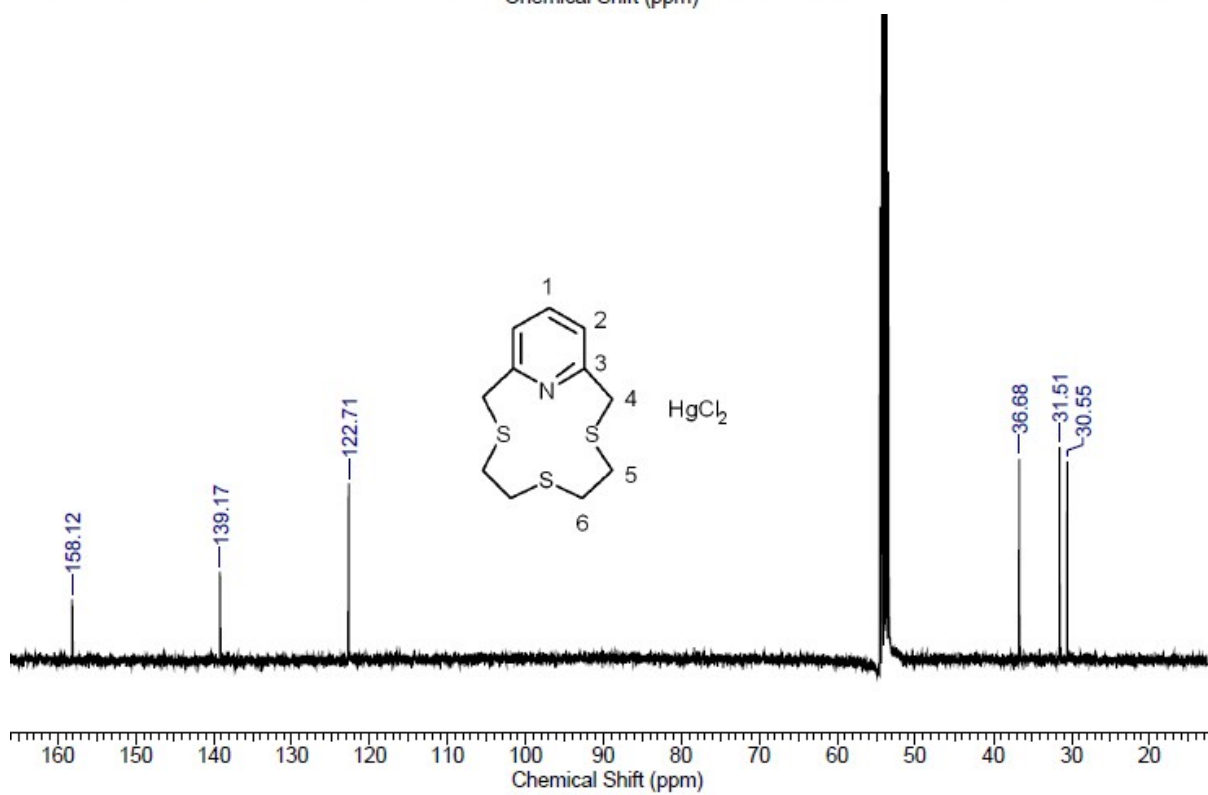

### Mercury Complex (22):

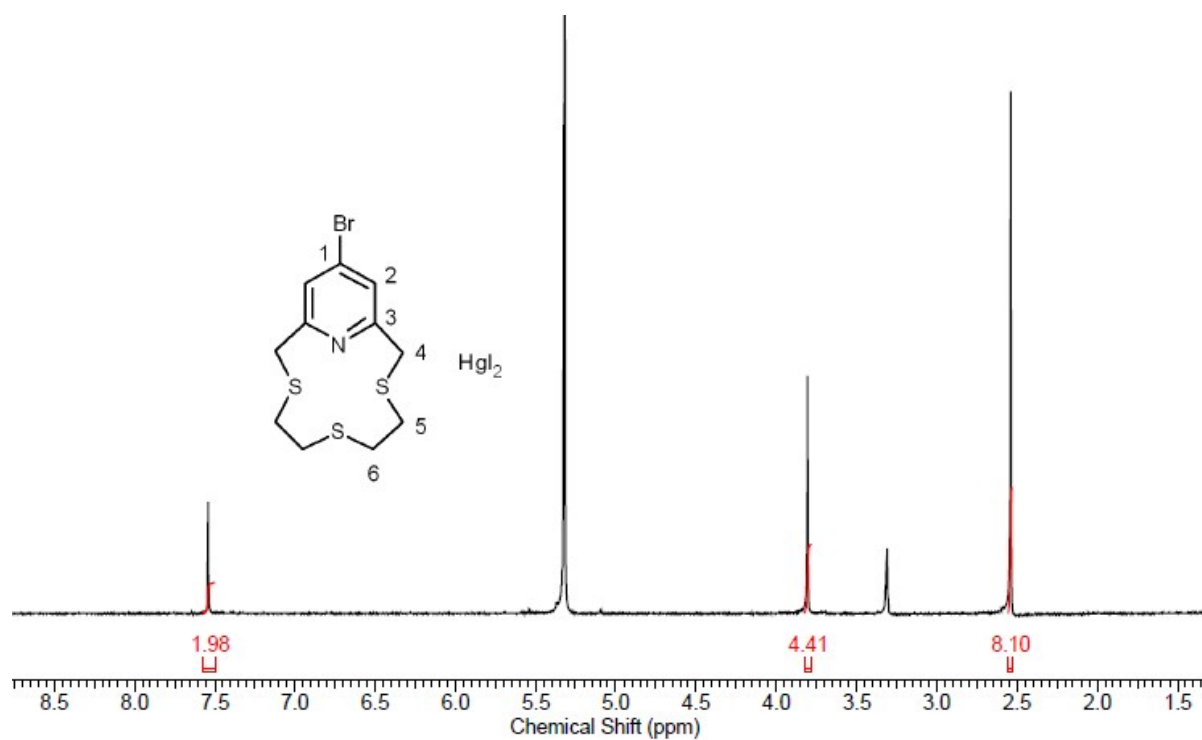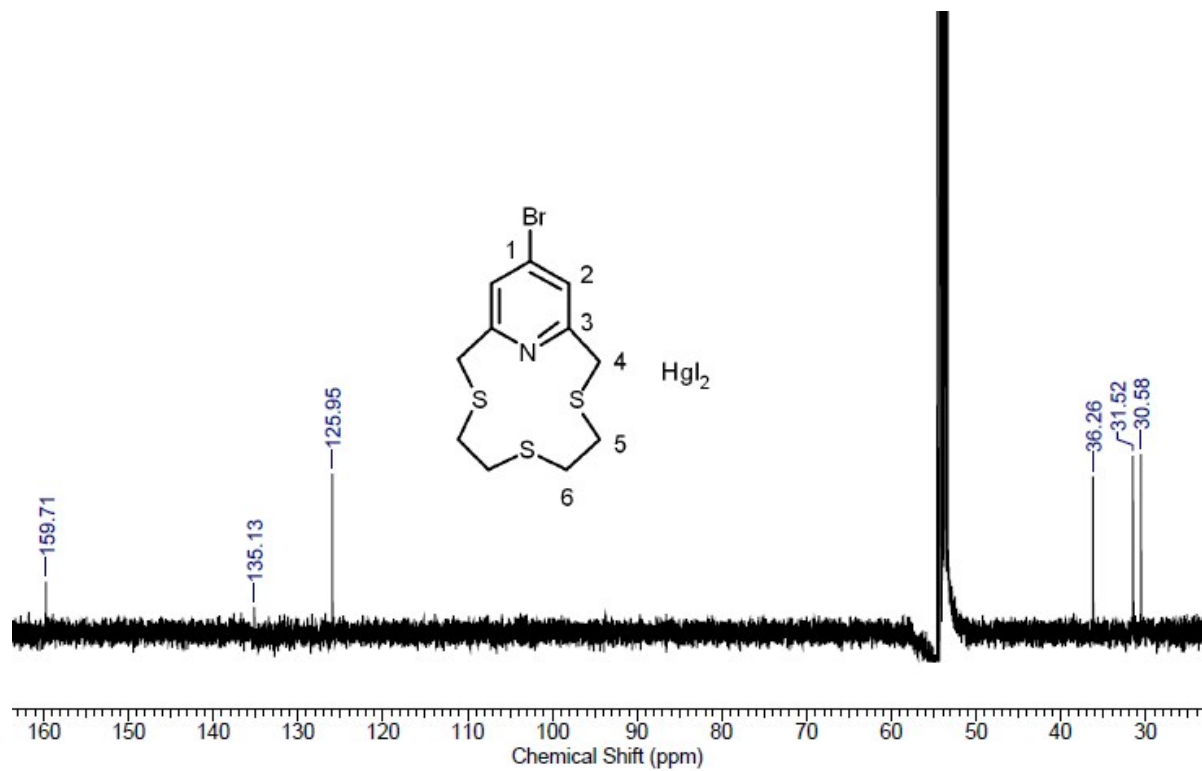

Mercury complex (23):

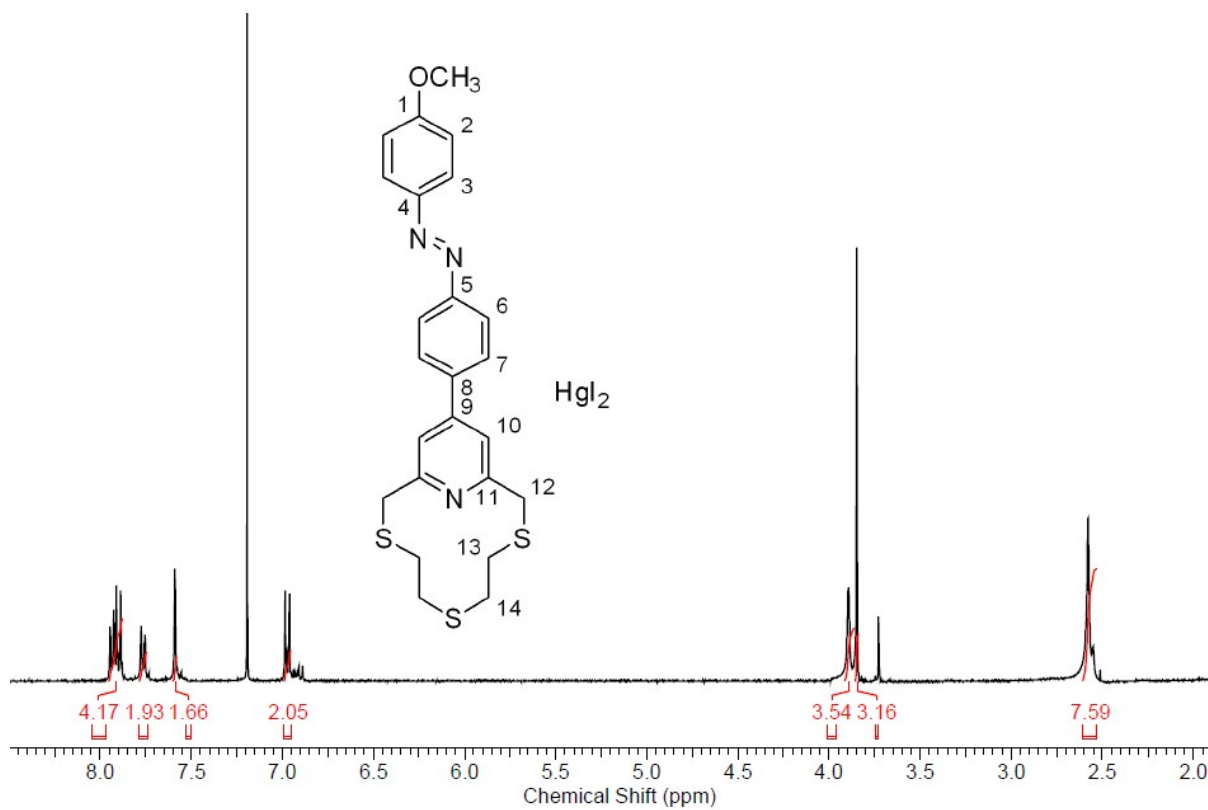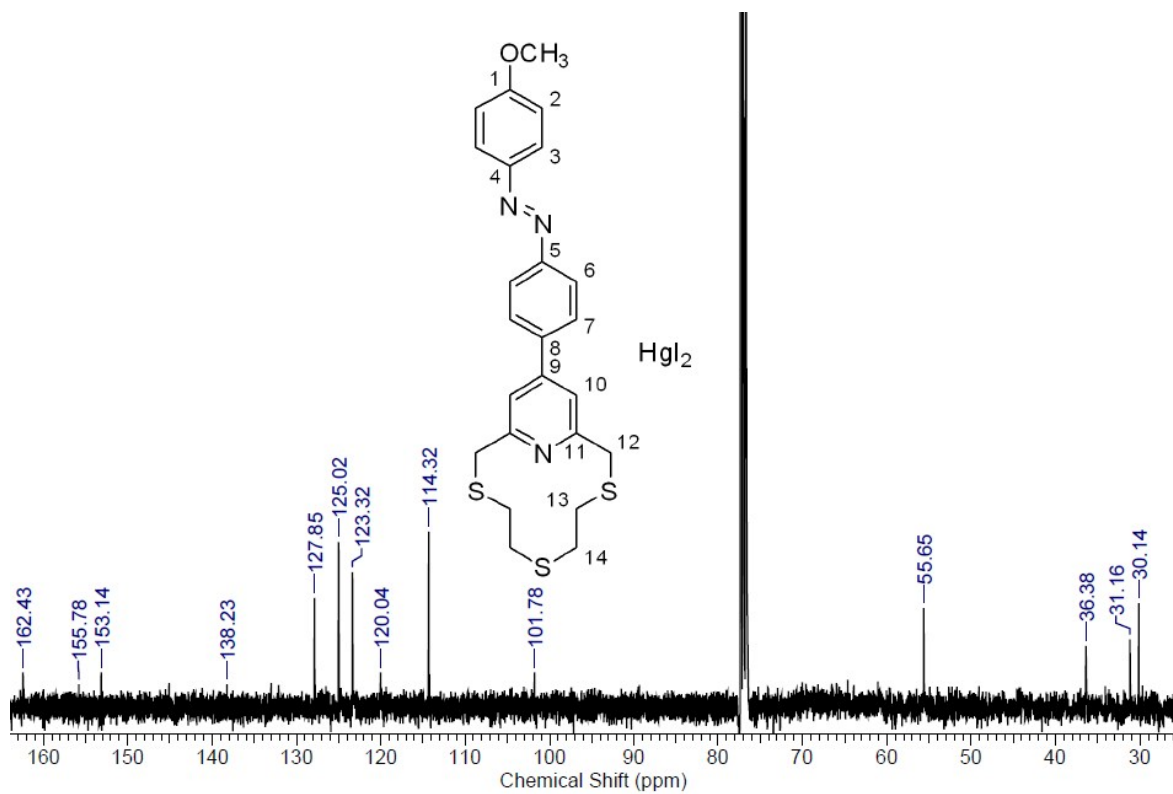

ii. TFA Blank reaction (24):

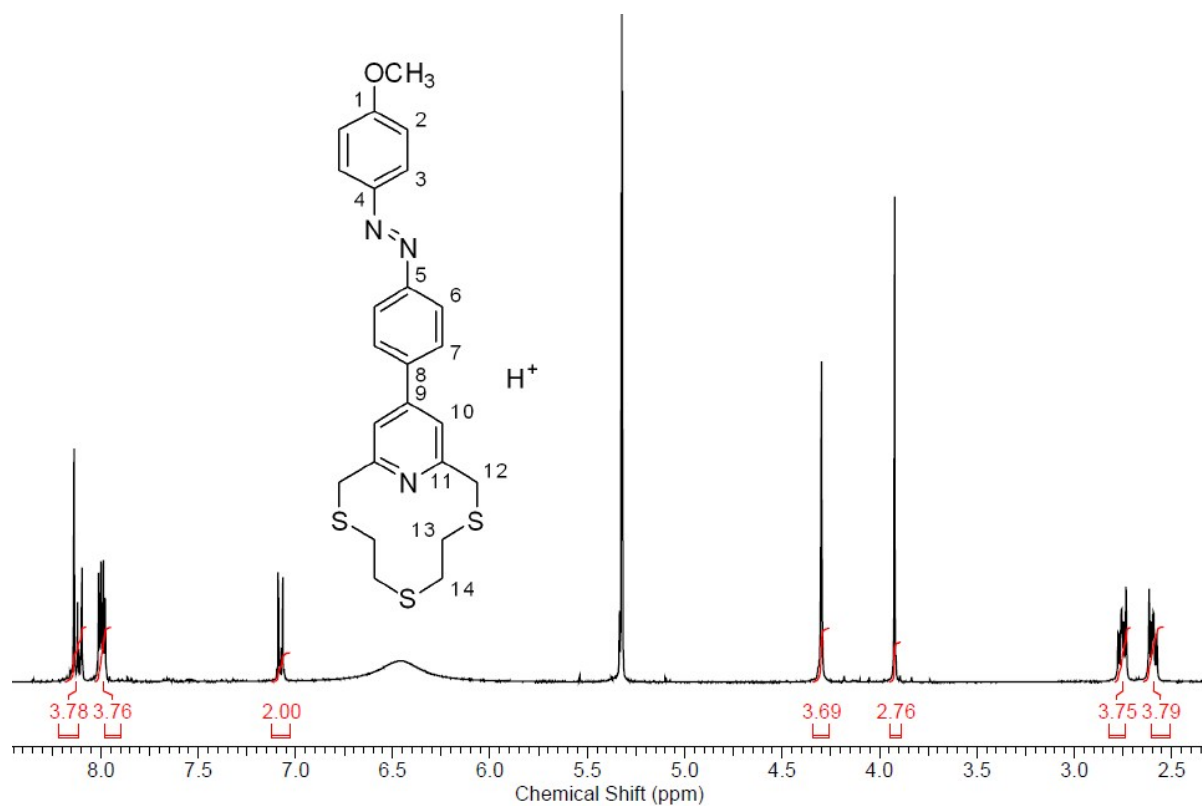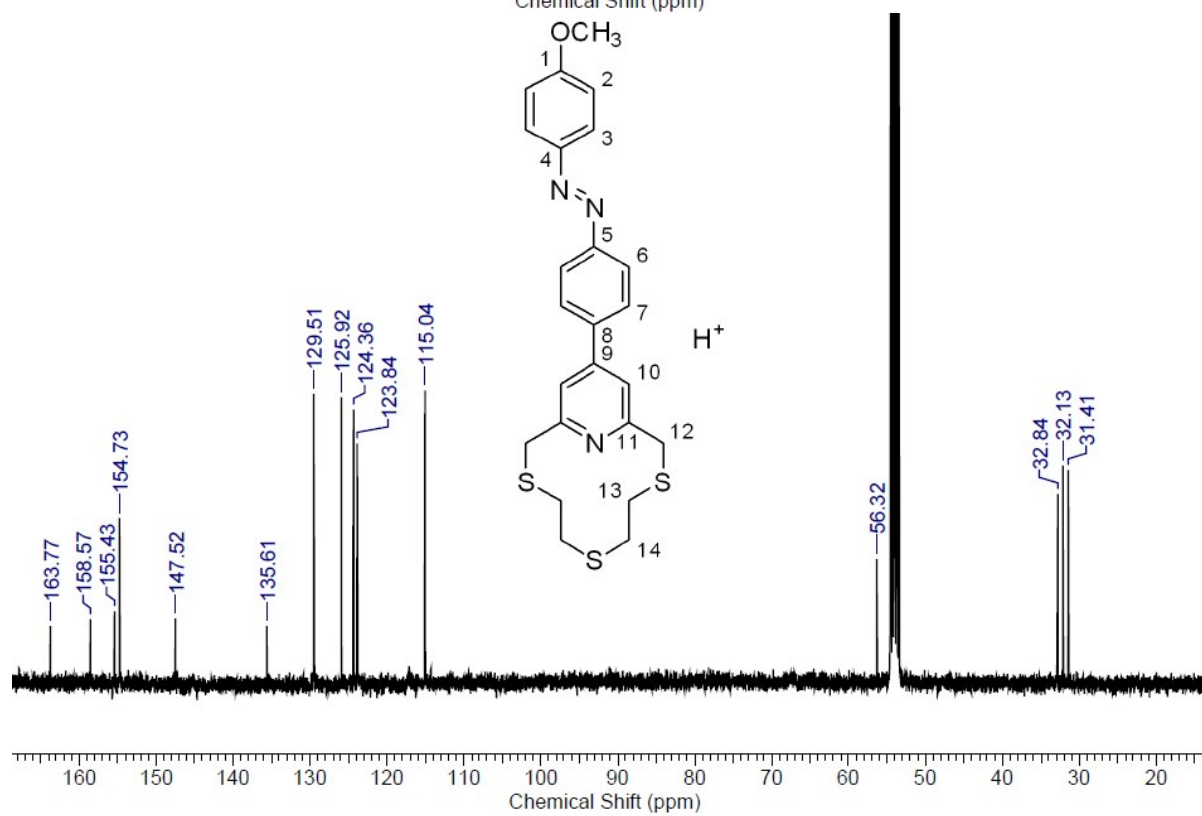

iii.  $^1\text{H}$  NMR Studies: Complexation of 13 with  $\text{Hg}_2\text{I}_4$  to afford complex 23

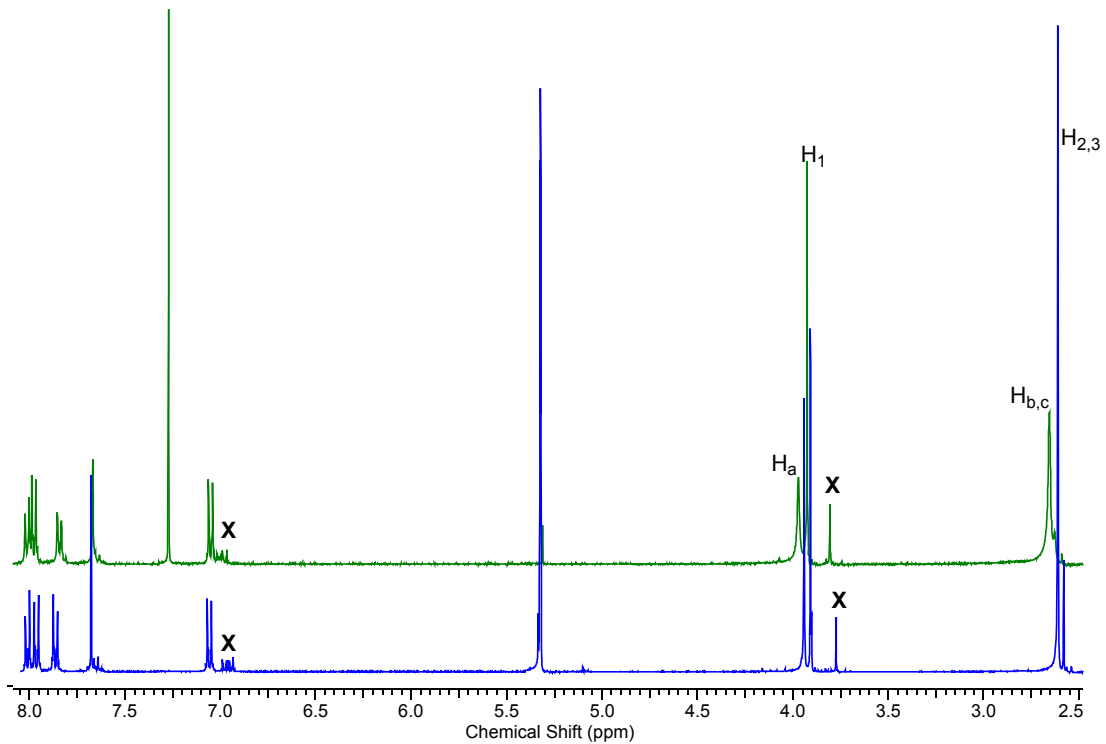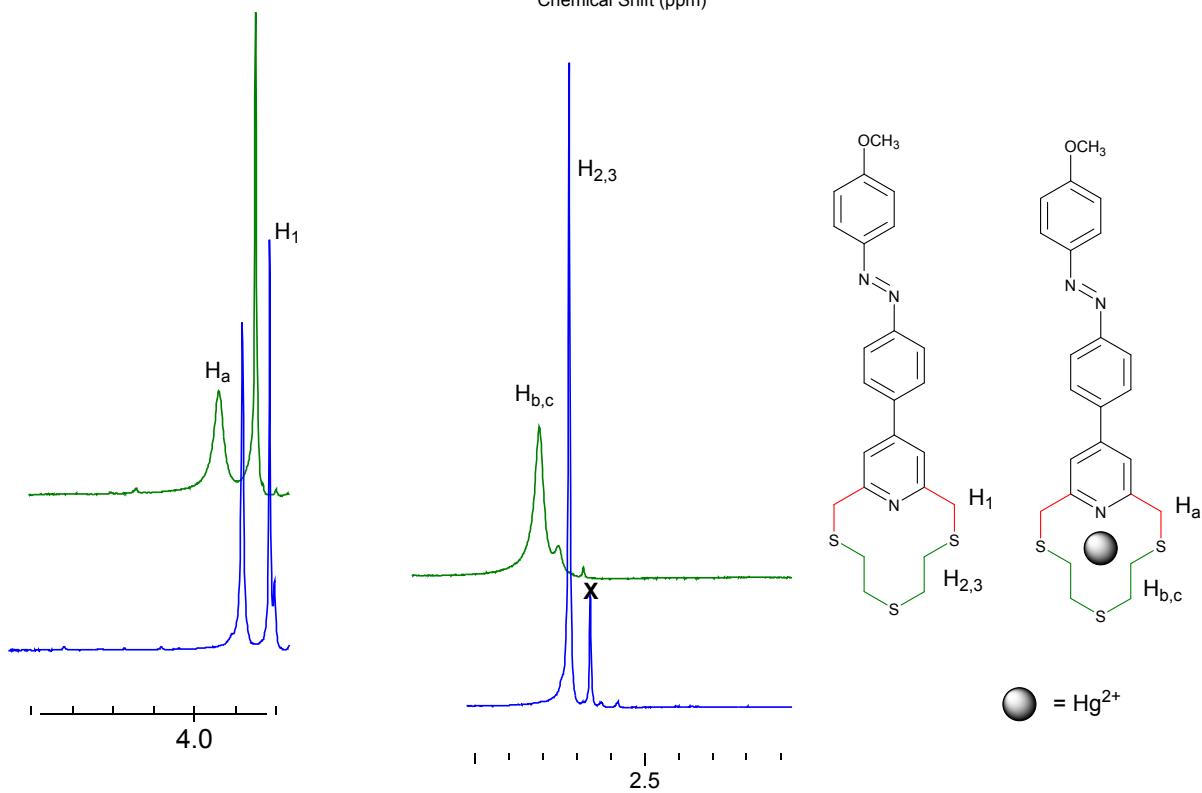

(X = impurity, possibly the Z-isomer of the azo dye)

#### iv. Single crystal X-ray diffraction

- a. **Data Collection. Data Collection.** Single crystal X-ray diffraction data were collected for the crystal structures **6**, **13**, **14**, **19**, **21** and **23** at a temperature of 100 K using Cu-K $\alpha$  radiation on a X8 Bruker prospector, equipped with an Oxford Cryosystems Cobra nitrogen flow gas system. Data were measured using Bruker Apex2 suite of programs.

Single crystal X-ray diffraction data were collected for the crystal structure **22** at a temperature of 150 K using Mo-K $\alpha$  radiation on an Agilent Supernova, equipped with an Oxford Cryosystems Cobra nitrogen flow gas system. Data were measured using CrisAlisPro suite of programs.

- b. **Crystal structure determinations and refinements.**

X-ray data was processed and reduced using Bruker Apex2 for crystal structures **6**, **13**, **14**, **19**, **21** and **23**. Absorption correction was performed using empirical methods based upon symmetry-equivalent reflections combined with measurements at different azimuthal angles using SADABS. X-ray data was processed and reduced using CrisALisPro for crystal structure **22**. Absorption correction was performed using empirical methods based upon symmetry-equivalent reflections combined with measurements at different azimuthal angles using SCALE3 ABSPACK. The crystal structures were solved and refined against all  $F^2$  values using the SHELX and Olex 2 suite of programs.<sup>1</sup> All the non-hydrogen atoms were refined anisotropically. Hydrogen atoms were placed in calculated positions and refined using idealized geometries (riding model) and assigned fixed isotropic displacement parameters. Atomic displacement parameters were restrained using RIGU and ISOR Shelx commands.

CCDC 1445149-1445161 contains the supplementary crystallographic data for this paper. These data can be obtained free of charge via [www.ccdc.cam.ac.uk/conts/retrieving.html](http://www.ccdc.cam.ac.uk/conts/retrieving.html) (or from the Cambridge Crystallographic Data Centre, 12 Union Road, Cambridge CB21EZ, UK; fax: (+44)1223-336-033; or [deposit@ccdc.cam.ac.uk](mailto:deposit@ccdc.cam.ac.uk)).

**c. Table S1. Crystallographic information for 6, 13, 14 and 19**

|                                                                           | <b>6</b>          | <b>13</b>         | <b>14</b>          | <b>19</b>             |
|---------------------------------------------------------------------------|-------------------|-------------------|--------------------|-----------------------|
| Crystal colour                                                            | White             | yellow            | yellow             | Blue                  |
| Crystal size (mm)                                                         | 0.21 × 0.2 × 0.16 | 0.15 × 0.1 × 0.04 | 0.13 × 0.12 × 0.01 | 0.13 × 0.09 × 0.02    |
| Crystal system                                                            | Orthorhombic      | Triclinic         | Triclinic          | Monoclinic            |
| Space group, <i>Z</i>                                                     | Pbcn, 8           | P-1, 2            | P-1, 2             | P2 <sub>1</sub> /c, 4 |
| <i>a</i> (Å)                                                              | 13.0722(6)        | 5.5032(2)         | 4.5402(3)          | 7.7435(2)             |
| <i>b</i> (Å)                                                              | 7.8927(4)         | 13.7541(5)        | 10.8201(7)         | 19.9374(4)            |
| <i>c</i> (Å)                                                              | 25.4406(12)       | 16.2814(5)        | 19.7081(11)        | 11.9344(3)            |
| $\alpha$ (°)                                                              | 90                | 66.950(2)         | 80.037(4)          | 90                    |
| $\beta$ (°)                                                               | 90                | 85.649(2)         | 86.240(5)          | 113.918(11)           |
| $\gamma$ (°)                                                              | 90                | 82.232(2)         | 87.076(4)          | 90                    |
| <i>V</i> (Å <sup>3</sup> )                                                | 2624.8(2)         | 1123.22(7)        | 950.74(10)         | 1809.47(7)            |
| Density (Mg.m <sup>-3</sup> )                                             | 1.702             | 1.383             | 1.416              | 1.989                 |
| Wavelength (Å)                                                            | 1.54178           | 1.54178           | 1.54178            | 1.54178               |
| Temperature (K)                                                           | 100               | 100               | 100                | 100                   |
| $\mu$ (Mo-K $\alpha$ ) (mm <sup>-1</sup> )                                | 8.498             | 3.189             | 0.848              | 7.920                 |
| 2 $\theta$ range (°)                                                      | 6.948 to 144.584  | 7.03 to 144.516   | 8.304 to 136.474   | 8.752 to 143.988      |
| Reflns collected                                                          | 15381             | 20554             | 6897               | 6852                  |
| Independent reflns ( <i>R</i> <sub>int</sub> )                            | 2584 (0.071)      | 4168 (0.0214)     | 3319 (0.0376)      | 3416 (0.0276)         |
| L.S. parameters, <i>p</i>                                                 | 145               | 281               | 274                | 241                   |
| No. of restraints, <i>r</i>                                               | 0                 | 0                 | 0                  | 4                     |
| <i>R</i> 1 ( <i>F</i> ) <sup>a</sup> <i>I</i> > 2.0 $\sigma$ ( <i>I</i> ) | 0.0378            | 0.0394            | 0.0447             | 0.0367                |
| <i>wR</i> 2( <i>F</i> <sup>2</sup> ), <sup>b</sup> all data               | 0.0960            | 0.1073            | 0.1285             | 0.0979                |
| <i>S</i> ( <i>F</i> <sup>2</sup> ), <sup>c</sup> all data                 | 1.062             | 1.046             | 1.022              | 1.047                 |

<sup>a</sup>  $R1(F) = \sum(|F_o| - |F_c|) / \sum |F_o|$ ; [b]  $wR2(F^2) = [\sum w(F_o^2 - F_c^2)^2 / \sum w F_o^4]^{1/2}$ ; [c]  $S(F^2) = [\sum w(F_o^2 - F_c^2)^2 / (n + r - p)]^{1/2}$



d. **Table S2.** Crystallographic information for **21-23.**

|                                                                  | <b>21</b>             | <b>22</b>             | <b>23</b>             |
|------------------------------------------------------------------|-----------------------|-----------------------|-----------------------|
| Crystal colour                                                   | White                 | White                 | Yellow                |
| Crystal size (mm)                                                | 0.16 × 0.05 × 0.02    | 0.14 × 0.11 × 0.04    | 0.13 × 0.12 × 0.02    |
| Crystal system                                                   | Monoclinic            | Monoclinic            | Monoclinic            |
| Space group, <i>Z</i>                                            | P2 <sub>1</sub> /n, 4 | P2 <sub>1</sub> /c, 4 | P2 <sub>1</sub> /c, 4 |
| <i>a</i> (Å)                                                     | 8.86244(15)           | 17.1949(11)           | 26.2853(4)            |
| <i>b</i> (Å)                                                     | 15.5399(3)            | 8.5255(5)             | 8.5588(2)             |
| <i>c</i> (Å)                                                     | 13.2869(2)            | 15.9682(10)           | 15.9777(2)            |
| β (°)                                                            | 93.3355(14)           | 91.274(6)             | 97.033(2)             |
| <i>V</i> (Å <sup>3</sup> )                                       | 1826.80(5)            | 2340.3(3)             | 3567.47(11)           |
| Density (Mg.m <sup>-3</sup> )                                    | 2.910                 | 3.534                 | 2.721                 |
| Wavelength (Å)                                                   | 1.54178               | 0.71073               | 1.54178               |
| Temperature (K)                                                  | 100                   | 150                   | 100                   |
| μ(Mo-Kα) (mm <sup>-1</sup> )                                     | 38.240                | 20.351                | 45.621                |
| 2θ range (°)                                                     | 8.764 to 148.584      | 6.732 to 50.698       | 6.776 to 149.176      |
| Reflns collected                                                 | 9572                  | 8124                  | 17878                 |
| Independent reflns ( <i>R</i> <sub>int</sub> )                   | 3542 (0.0321)         | 4278 (0.0406)         | 7066 (0.0391)         |
| L.S. parameters, <i>p</i>                                        | 190                   | 199                   | 362                   |
| No. of restraints, <i>r</i>                                      | 174                   | 189                   | 303                   |
| <i>R</i> 1 ( <i>F</i> ) <sup>a</sup> <i>I</i> > 2.0σ( <i>I</i> ) | 0.0292                | 0.0378                | 0.0415                |
| <i>wR</i> 2( <i>F</i> <sup>2</sup> ), <sup>b</sup> all data      | 0.0810                | 0.0682                | 0.1072                |
| <i>S</i> ( <i>F</i> <sup>2</sup> ), <sup>c</sup> all data        | 1.127                 | 1.003                 | 1.049                 |

<sup>a</sup>  $R1(F) = \sum(|F_o| - |F_c|) / \sum |F_o|$ ; [b]  $wR2(F^2) = [\sum w(F_o^2 - F_c^2)^2 / \sum w F_o^4]^{1/2}$ ; [c]  $S(F^2) = [\sum w(F_o^2 - F_c^2)^2 / (n + r - p)]^{1/2}$

[1] a) G. M. Sheldrick., *Acta Crystallogr.*, **2015**, *C71*, 3-8, b) O. V. Dolomanov, L. J. Bourhis, R. J. Gildea, J. A. K. Howard, H. Puschmann, *J. Appl. Cryst.*, **2009**, *42*, 339–341

e. Selected bond lengths, bond angles and torsion angles.

**Compound : 6 (UoM: s3707ma)**

**Selected torsion angles (°):**

N(1)-C(3)-C(4)-S(1) = 92.9(2);  
S(1)-C(5)-C(6)-S(2) = -179.40(15);  
S(2)-C(7)-C(8)-S(3) = -177.67(13);  
S(3)-C(9)-C(10)-N(1) = -121.4(2);  
C(6)-C(5)-S(1)-C(4) = 109.2(2);  
C(10)-C(9)-S(3)-C(8) = 47.7(2).

**Selected bond lengths (Å):**

Br(1)-C(1) = 1.891(3);  
C(5)-S(1) = 1.826(3);  
C(8)-S(3) = 1.816(3);  
C(7)-S(2) = 1.812(3);  
C(5)-S(1) = 1.826(3);  
C(4)-S(1) = 1.825(3).

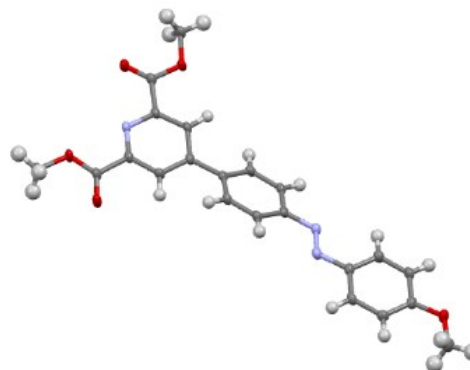

**Compound: 14 (UoM: s3976ma)**

**Selected torsion angles (°):**

C(10)-C(11)-C(14)-C(15) = -26.1(3);  
C(12)-C(11)-C(14)-C(18) = -27.5(3);  
C(3)-C(4)-N(1)-N(2) = -172.71(17);  
C(5)-C(4)-N(1)-N(2) = 8.1(3);  
C(4)-N(1)-N(2)-C(8) = -178.64(15);  
C(13)-C(8)-N(2)-N(1) = -170.59(16);  
C(9)-C(8)-N(2)-N(1) = 11.4(3).

**Selected bond lengths (Å):**

C(11)-C(14) = 1.482(3);  
C(8)-N(2) = 1.418(3);  
N(1)-N(2) = 1.257(2);  
C(4)-N(1) = 1.422(3);  
C(1)-O(1) = 1.359(3).

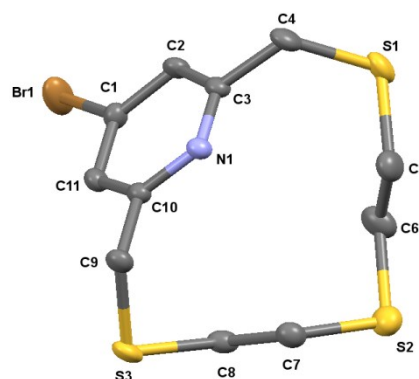

**Compound: 13 (UoM: s4010ma)**

**Selected torsion angles (°):**

S(2)-C(1)-C(2)-S(1) = 175.94(10);  
S(1)-C(3)-C(4)-N(1) = 118.67(17);  
S(1)-C(3)-C(4)-C(9) = -59.5(2);  
N(1)-C(5)-C(6)-S(3) = -98.68(18);  
S(3)-C(7)-C(8)-S(2) = 178.96(11);  
C(9)-C(10)-C(12)-C(17) = -8.3(3);  
C(11)-C(10)-C(12)-C(17) = 172.3(2);  
C(9)-C(10)-C(12)-C(13) = 170.1(2);  
C(11)-C(10)-C(12)-C(13) = -9.3(3);  
C(16)-C(15)-N(2)-N(3) = 162.9(2);  
C(14)-C(15)-N(2)-N(3) = -18.6(3);  
C(15)-N(2)-N(3)-C(18) = 178.35(16);  
C(19)-C(18)-N(3)-N(2) = 165.31(19);  
C(23)-C(18)-N(3)-N(2) = -14.5(3).

**Selected bond lengths (Å):**

N(2)-N(3) = 1.254(2);  
C(10)-C(12) = 1.493(2);  
C(15)-N(2) = 1.429(2);  
C(18)-N(3) = 1.422(2);  
C(21)-O(1) = 1.364(3)

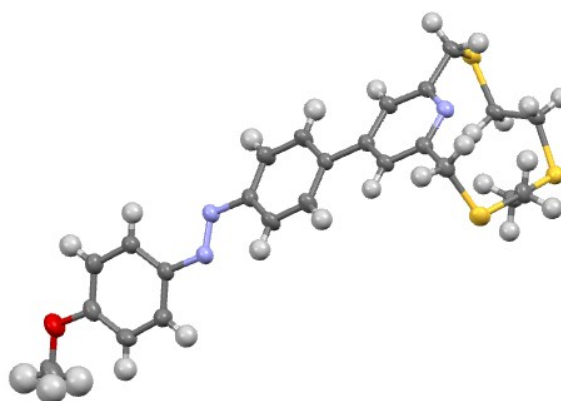

**Compound: 19 (UoM: s4114ma)**

**Selected bond angles (°):**

O(1)-Cu(1)-N(1) = 172.16(11);  
O(1)-Cu(1)-O(2) = 86.14(10);  
N(1)-Cu(1)-O(2) = 87.62(10);  
O(1)-Cu(1)-S(1) = 92.03(9);  
N(1)-Cu(1)-S(1) = 86.21(8);  
O(2)-Cu(1)-S(1) = 114.23(7);  
O(1)-Cu(1)-S(3) = 97.74(9);  
N(1)-Cu(1)-S(3) = 85.90(8);  
O(2)-Cu(1)-S(3) = 80.61(6);  
S(1)-Cu(1)-S(3) = 162.86(3);  
O(1)-Cu(1)-S(2) = 92.35(8);  
N(1)-Cu(1)-S(2) = 95.06(8);  
O(2)-Cu(1)-S(2) = 161.61(6);  
S(1)-Cu(1)-S(2) = 84.12(3);  
S(3)-Cu(1)-S(2) = 81.45(3).

**Selected bond lengths (Å):**

Br(1)-C(1) = 1.878(3);  
C(4)-S(1) = 1.803(4);  
C(5)-S(1) = 1.832(4);  
C(6)-S(2) = 1.823(3);  
C(7)-S(2) = 1.815(3);  
C(8)-S(3) = 1.815(4);  
C(9)-S(3) = 1.807(3);  
Cu(1)-N(1) = 1.978(3);  
Cu(1)-O(1) = 1.929(2);  
Cu(1)-O(2) = 2.335(3);  
Cu(1)-S(1) = 2.3736(9);  
Cu(1)-S(2) = 2.7304(10);  
Cu(1)-S(3) = 2.4301(8).

---

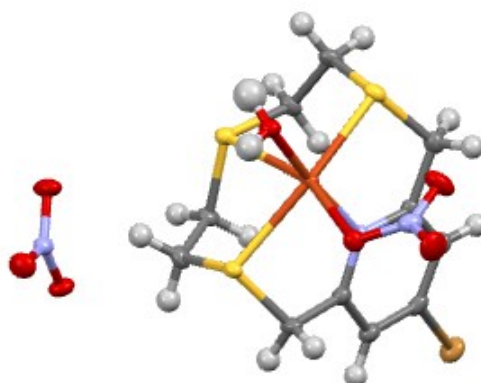

**Compound: 23 (UoM: s4137na)****Selected bond lengths (Å):**

C(21)-O(1) = 1.366(12);  
C(18)-N(3) = 1.420(10);  
N(2)-N(3) = 1.257(12);  
C(15)-N(2) = 1.417(12);  
C(1)-C(2) = 1.389(11);  
Hg(1)-S(2) = 2.539(2);  
Hg(1)-N(1) = 2.563(6);  
Hg(1)-I(1) = 2.6562(6);  
Hg(1)-S(1) = 2.739(2);  
Hg(1)-S(3) = 2.760(2);  
Hg(2)-I(3) = 2.7330(6);  
Hg(2)-I(2) = 2.7357(6);  
Hg(2)-I(4) = 2.7736(7).

**Selected bond angles (°):**

S(2)-Hg(1)-N(1) = 102.16(15);  
S(2)-Hg(1)-I(1) = 154.72(5);  
N(1)-Hg(1)-I(1) = 103.08(15);  
S(2)-Hg(1)-S(1) = 82.13(6);  
N(1)-Hg(1)-S(1) = 71.73(15);  
I(1)-Hg(1)-S(1) = 104.60(5);  
S(2)-Hg(1)-S(3) = 82.05(6);  
N(1)-Hg(1)-S(3) = 72.20(16);  
I(1)-Hg(1)-S(3) = 106.99(5);  
S(1)-Hg(1)-S(3) = 136.23(6);  
I(3)-Hg(2)-I(2) = 108.544(19);  
I(3)-Hg(2)-I(4) = 116.84(2);  
I(2)-Hg(2)-I(4) = 125.21(2);  
I(3)-Hg(2)-I(4)#1 = 104.23(2);  
I(2)-Hg(2)-I(4)#1 = 107.63(2);  
I(4)-Hg(2)-I(4)#1 = 89.807(18);  
Hg(2)-I(4)-Hg(2)#1 = 90.195(18).

**Selected torsion angles (°):**

C(2)-C(1)-C(12)-C(17) = 36.4(12);  
C(11)-C(1)-C(12)-C(17) = -144.1(9);  
C(2)-C(1)-C(12)-C(13) = 140.2(9);  
C(11)-C(1)-C(12)-C(13) = 39.4(12);  
C(14)-C(15)-N(2)-N(3) = 154.4(9);  
C(16)-C(15)-N(2)-N(3) = -27.2(13);  
C(15)-N(2)-N(3)-C(18) = 177.7(8);  
C(19)-C(18)-N(3)-N(2) = -12.2(13);  
C(23)-C(18)-N(3)-N(2) = 168.3(9).

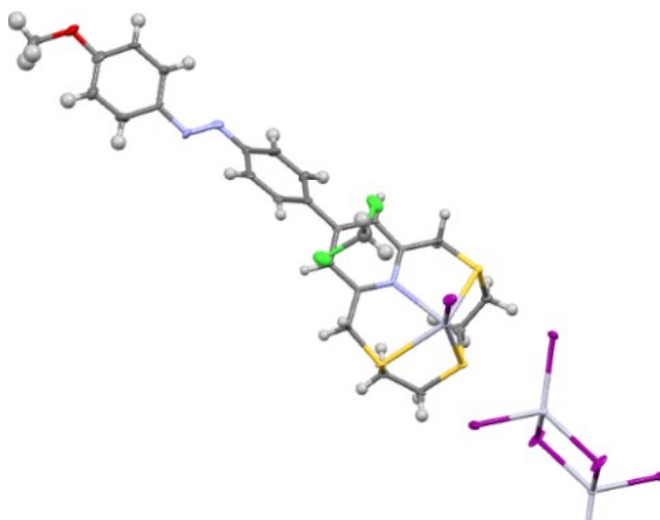

**Compound: 21 (UoM: s4146na)**

**Selected bond angles (°):**

Hg(2)-Cl(4)-Hg(2)#1 = 93.65(5);  
Cl(1)-Hg(1)-N(1) = 125.25(12);  
Cl(1)-Hg(1)-S(2) = 144.48(5);  
N(1)-Hg(1)-S(2) = 89.36(12);  
Cl(1)-Hg(1)-S(3) = 109.96(5);  
N(1)-Hg(1)-S(3) = 76.28(13);  
S(2)-Hg(1)-S(3) = 83.68(5);  
Cl(1)-Hg(1)-S(1) = 99.32(5);  
N(1)-Hg(1)-S(1) = 75.41(12);  
S(2)-Hg(1)-S(1) = 80.37(5);  
S(3)-Hg(1)-S(1) = 147.50(5);  
Cl(2)-Hg(2)-Cl(3) = 131.07(6);  
Cl(2)-Hg(2)-Cl(4) = 119.00(6);  
Cl(3)-Hg(2)-Cl(4) = 108.19(6).

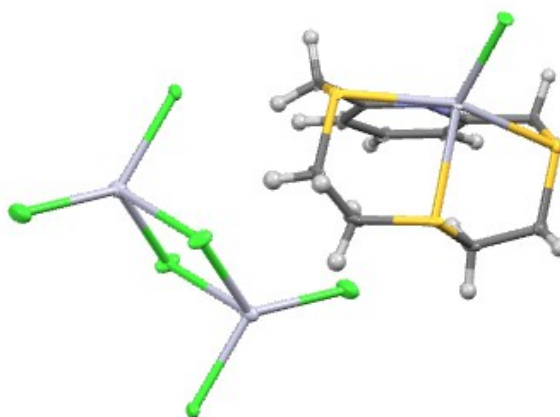

**Selected bond lengths (Å):**

Hg(1)-N(1) = 2.463(5);  
Hg(1)-S(2) = 2.6089(15);  
Hg(1)-S(3) = 2.6617(15);  
Hg(1)-S(1) = 2.7276(15);  
Hg(2)-Cl(4)#1 = 2.8671(17);  
Cl(1)-Hg(1) = 2.4041(15);  
Cl(2)-Hg(2) = 2.3730(18);  
Cl(3)-Hg(2) = 2.4402(16);  
Cl(4)-Hg(2) = 2.5223(16).

---

**Compound: 22 (UoM: s4155na)****Selected bond angles (°): and Selected bond lengths (Å):**

|                  |           |
|------------------|-----------|
| Br(1)-C(1)       | 1.898(10) |
| C(1)-C(2)        | 1.358(13) |
| C(1)-C(11)       | 1.393(12) |
| C(2)-C(3)        | 1.396(13) |
| C(2)-H(2)        | 0.9500    |
| C(3)-N(1)        | 1.343(11) |
| C(3)-C(4)        | 1.513(13) |
| C(4)-S(1)        | 1.802(11) |
| C(4)-H(4A)       | 0.9900    |
| C(4)-H(4B)       | 0.9900    |
| C(5)-C(6)        | 1.508(12) |
| C(5)-S(1)        | 1.809(9)  |
| C(5)-H(5A)       | 0.9900    |
| C(5)-H(5B)       | 0.9900    |
| C(6)-S(2)        | 1.826(10) |
| C(6)-H(6A)       | 0.9900    |
| C(6)-H(6B)       | 0.9900    |
| C(7)-C(8)        | 1.524(15) |
| C(7)-S(2)        | 1.813(10) |
| C(7)-H(7A)       | 0.9900    |
| C(7)-H(7B)       | 0.9900    |
| C(8)-S(3)        | 1.819(10) |
| C(8)-H(8A)       | 0.9900    |
| C(8)-H(8B)       | 0.9900    |
| C(9)-C(10)       | 1.507(12) |
| C(9)-S(3)        | 1.806(10) |
| C(9)-H(9A)       | 0.9900    |
| C(9)-H(9B)       | 0.9900    |
| C(10)-N(1)       | 1.354(11) |
| C(10)-C(11)      | 1.388(13) |
| C(11)-H(11)      | 0.9500    |
| Hg(1)-S(2)       | 2.550(2)  |
| Hg(1)-N(1)       | 2.602(8)  |
| Hg(1)-I(1)       | 2.6558(7) |
| Hg(1)-S(3)       | 2.726(2)  |
| Hg(1)-S(1)       | 2.781(3)  |
| Hg(2)-I(4)       | 2.7286(7) |
| Hg(2)-I(2)       | 2.7396(8) |
| Hg(2)-I(3)       | 2.7755(9) |
| Hg(2)-I(3)#1     | 3.0088(8) |
| I(3)-Hg(2)#1     | 3.0088(8) |
|                  |           |
| C(2)-C(1)-C(11)  | 119.9(9)  |
| C(2)-C(1)-Br(1)  | 121.5(7)  |
| C(11)-C(1)-Br(1) | 118.5(7)  |
| C(1)-C(2)-C(3)   | 119.8(9)  |
| C(1)-C(2)-H(2)   | 120.1     |
| C(3)-C(2)-H(2)   | 120.1     |
| N(1)-C(3)-C(2)   | 121.5(9)  |
| N(1)-C(3)-C(4)   | 120.9(9)  |
| C(2)-C(3)-C(4)   | 117.6(8)  |
| C(3)-C(4)-S(1)   | 119.0(7)  |
| C(3)-C(4)-H(4A)  | 107.6     |
| S(1)-C(4)-H(4A)  | 107.6     |
| C(3)-C(4)-H(4B)  | 107.6     |
| S(1)-C(4)-H(4B)  | 107.6     |
| H(4A)-C(4)-H(4B) | 107.0     |
| C(6)-C(5)-S(1)   | 116.4(7)  |
| C(6)-C(5)-H(5A)  | 108.2     |
| S(1)-C(5)-H(5A)  | 108.2     |
| C(6)-C(5)-H(5B)  | 108.2     |

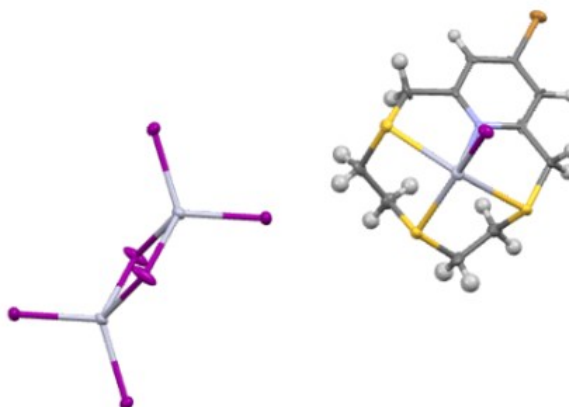

|                    |            |
|--------------------|------------|
| S(1)-C(5)-H(5B)    | 108.2      |
| H(5A)-C(5)-H(5B)   | 107.4      |
| C(5)-C(6)-S(2)     | 110.1(7)   |
| C(5)-C(6)-H(6A)    | 109.6      |
| S(2)-C(6)-H(6A)    | 109.6      |
| C(5)-C(6)-H(6B)    | 109.6      |
| S(2)-C(6)-H(6B)    | 109.6      |
| H(6A)-C(6)-H(6B)   | 108.1      |
| C(8)-C(7)-S(2)     | 116.4(6)   |
| C(8)-C(7)-H(7A)    | 108.2      |
| S(2)-C(7)-H(7A)    | 108.2      |
| C(8)-C(7)-H(7B)    | 108.2      |
| S(2)-C(7)-H(7B)    | 108.2      |
| H(7A)-C(7)-H(7B)   | 107.4      |
| C(7)-C(8)-S(3)     | 111.9(7)   |
| C(7)-C(8)-H(8A)    | 109.2      |
| S(3)-C(8)-H(8A)    | 109.2      |
| C(7)-C(8)-H(8B)    | 109.2      |
| S(3)-C(8)-H(8B)    | 109.2      |
| H(8A)-C(8)-H(8B)   | 107.9      |
| C(10)-C(9)-S(3)    | 118.1(7)   |
| C(10)-C(9)-H(9A)   | 107.8      |
| S(3)-C(9)-H(9A)    | 107.8      |
| C(10)-C(9)-H(9B)   | 107.8      |
| S(3)-C(9)-H(9B)    | 107.8      |
| H(9A)-C(9)-H(9B)   | 107.1      |
| N(1)-C(10)-C(11)   | 123.1(8)   |
| N(1)-C(10)-C(9)    | 120.4(9)   |
| C(11)-C(10)-C(9)   | 116.5(8)   |
| C(10)-C(11)-C(1)   | 117.5(9)   |
| C(10)-C(11)-H(11)  | 121.3      |
| C(1)-C(11)-H(11)   | 121.3      |
| S(2)-Hg(1)-N(1)    | 100.69(17) |
| S(2)-Hg(1)-I(1)    | 153.21(7)  |
| N(1)-Hg(1)-I(1)    | 105.95(15) |
| S(2)-Hg(1)-S(3)    | 82.75(8)   |
| N(1)-Hg(1)-S(3)    | 70.85(16)  |
| I(1)-Hg(1)-S(3)    | 108.47(6)  |
| S(2)-Hg(1)-S(1)    | 81.03(8)   |
| N(1)-Hg(1)-S(1)    | 71.07(17)  |
| I(1)-Hg(1)-S(1)    | 104.88(5)  |
| S(3)-Hg(1)-S(1)    | 134.67(8)  |
| I(4)-Hg(2)-I(2)    | 109.19(3)  |
| I(4)-Hg(2)-I(3)    | 126.58(3)  |
| I(2)-Hg(2)-I(3)    | 115.97(3)  |
| I(4)-Hg(2)-I(3)#1  | 104.51(3)  |
| I(2)-Hg(2)-I(3)#1  | 106.55(3)  |
| I(3)-Hg(2)-I(3)#1  | 88.89(2)   |
| Hg(2)-I(3)-Hg(2)#1 | 91.11(2)   |
| C(3)-N(1)-C(10)    | 118.2(8)   |
| C(3)-N(1)-Hg(1)    | 121.3(6)   |
| C(10)-N(1)-Hg(1)   | 118.0(6)   |
| C(4)-S(1)-C(5)     | 103.0(5)   |
| C(4)-S(1)-Hg(1)    | 104.0(3)   |
| C(5)-S(1)-Hg(1)    | 98.1(3)    |
| C(7)-S(2)-C(6)     | 101.4(5)   |
| C(7)-S(2)-Hg(1)    | 102.8(3)   |
| C(6)-S(2)-Hg(1)    | 99.2(3)    |
| C(9)-S(3)-C(8)     | 101.4(5)   |
| C(9)-S(3)-Hg(1)    | 99.9(3)    |
| C(8)-S(3)-Hg(1)    | 94.3(3)    |

---
